# Supplementary material for: Sub- m -benziporphyrin: a subcarbaporphyrinoid and its B III complex with an unprecedented planar tridentate 14π-aromatic network
Source: Royal Society of Chemistry journal article supplement (doi:10.1039/d4sc07199a), 2024-12-03
Supplement: d4sc07199a1.pdf [file d4sc07199a1.pdf]

## Supporting Information

### Table of Contents

1. Instruments and Materials
2. Experimental Procedures
3. Spectra of Compounds
4. Electrochemical Data
5. X-Ray Crystal Data
6. DFT Calculations

## 1. Instruments and Materials

$^1\text{H}$  NMR (500 MHz) spectra were measured by a Bruker AVANCE-500 spectrometer, and chemical shifts were reported on the delta scale in ppm relative to  $\text{CHCl}_3$  as an internal reference ( $\delta = 7.26$  ppm). UV/Vis absorption spectra were recorded on a Shimadzu UV-3600 spectrometer. MALDI-TOF mass spectra were obtained with a Bruker ultrafleXtreme MALDI-TOF/TOF spectrometer with matrix. X-ray data were taken on an Agilent SuperNova, X-ray diffractometer equipped with a large area CCD detector. Redox potentials were measured by cyclic voltammetry on a CHI900 scanning electrochemical microscope. Unless otherwise noted, materials obtained from commercial suppliers were used without further purification. Redox potentials were measured by the cyclic voltammetry and differential pulse voltammetry method on an ALS660 electrochemical analyzed model (Solvent:  $\text{CH}_2\text{Cl}_2$ , Electrolyte: 0.1 M  $n\text{Bu}_4\text{NPF}_6$ , Working electrode: glassy carbon, Reference electrode:  $\text{Ag}/\text{AgNO}_3$ , Counter electrode: Pt wire, Scan rate: 0.05 V/s, External reference: ferrocene/ferrocenium cation).  $\text{CH}_2\text{Cl}_2$  passed through an alumina column was used for electrochemical analysis.

## 2. Experimental Procedure

### Synthesis of 6 and 7.

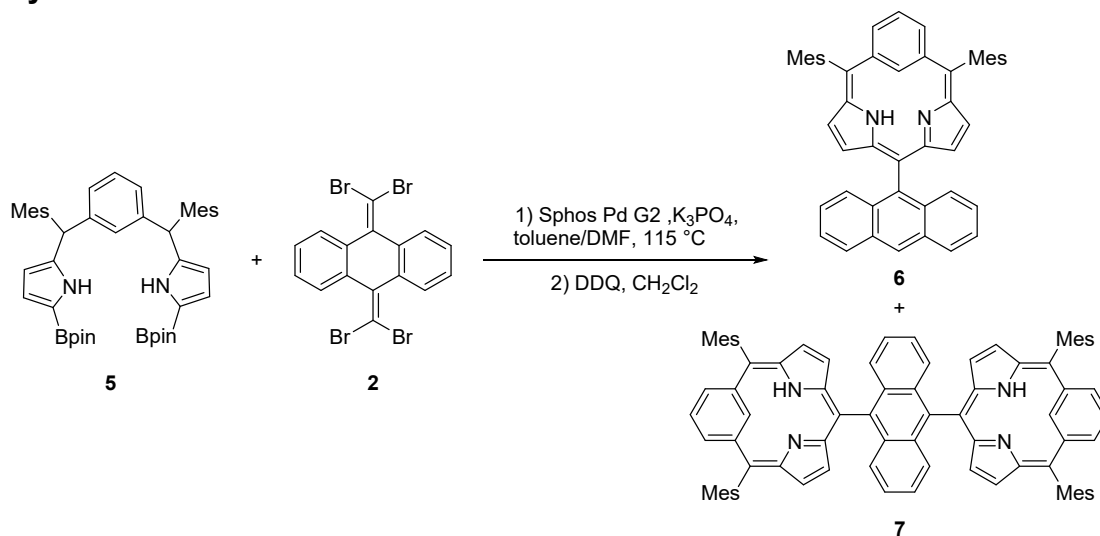

A toluene–DMF solution (5 mL/2.5 mL) of  $\alpha,\alpha'$ -diborylbenzotripyrrane **5** (434.6 mg, 0.6 mmol), 9,10-bis(dibromomethylene)-9,10-dihydroanthracene **2** (208.0 mg, 0.4 mmol), SPhos Pd G2 (28.8 mg, 0.04 mmol), and  $K_3PO_4$  (426.6 mg, 2.0 mmol) was degassed through three freeze-pump-thaw cycles, and the reaction flask was purged with argon. The resulting mixture was refluxed for 48 h. The reaction mixture was diluted with  $CHCl_3$ , washed with water, and dried over anhydrous sodium sulfate. After the solvent was removed, an excess amount of DDQ was added to the mixture in  $CH_2Cl_2$  and the resulting solution was stirred for another 10 min. The reaction mixture was passed through a short alumina column with  $CH_2Cl_2$  as an eluent. Evaporation of the solvent followed by column chromatography through silica gel ( $CH_2Cl_2/n$ -hexane as an eluent) and recrystallization from *n*-hexane gave **6** as green solids (14.7 mg, 0.011 mmol, 5.6% yield) and **7** (12.3 mg, 0.011 mmol, 2.7%) as green solids.

**6**:  $^1H$  NMR (500 MHz,  $CDCl_3$ )  $\delta$  = 19.54 (s, 1H, N-H), 8.52 (s, 1H, anthryl-H), 8.41 (d,  $J$  = 8.5 Hz, 1H, anthryl-H), 8.05 (m, 2H, anthryl-H), 7.81 (d,  $J$  = 8.5 Hz, 1H, anthryl-H), 7.47 (m, 2H, anthryl-H), 7.40 (t, 1H, Ph-H), 7.36 (m, 2H, anthryl-H), 7.07 (d,  $J$  = 7 Hz, 2H, phenyl-H), 7.06 (s, 2H, Mes-*m*-H), 6.93 (s, 2H, Mes-*m*-H), 6.67 (d,  $J$  = 4.5 Hz, 2H, pyrrole-H), 6.65 (s, 1H, phenyl-H), 6.18 (d,  $J$  = 4.5 Hz, 2H, pyrrole-H), 2.46 (s, 6H, Me-H), 2.37 (s, 6H, Me-H), and 2.02 (s, 6H, Me-H) ppm.  $\lambda_{max}$  ( $\epsilon$  [ $M^{-1}cm^{-1}$ ]) = 385 (20100), 670 (4700) nm. (HR-MS (MALDI-TOF-MS):  $m/z$  = 656.3152, calcd for  $(C_{49}H_{40}N_2)^+$  = 656.3186( $[M]^+$ ).

**7**:  $^1H$  NMR (500 MHz,  $CDCl_3$ )  $\delta$  = 19.63-19.59 (s+s, 2H, N-H), 8.53-8.49 (m, 2H, anthryl-H), 7.91-7.89 (m, 2H, anthryl-H), 7.43-7.36 (m, 6H, anthryl-H+phenyl-H), 7.11-7.09 (m, 8H, anthryl-H+phenyl-H), 6.96 (s, 4H, Ar-*m*-H), 6.72 (d,  $J$  = 4.5 Hz, 4H, pyrrole-H), 6.70+6.69 (s+s, 2H, inner Phenyl-H), 6.32-6.28 (m, 4H, pyrrole-H), 2.49 (s, 12H, Me-H), 2.40 (s, 12H, Me-H), and 2.06 (s, 12H, Me-H) ppm.  $\lambda_{max}$  ( $\epsilon$  [ $M^{-1}cm^{-1}$ ]) = 392 (45400), 670 (11700) nm. HR-MS (MALDI-TOF-MS):  $m/z$  = 1134.5505, calcd for  $(C_{84}H_{70}N_4)^+$  = 1134.5595( $[M]^+$ ).

### Synthesis of **8**.

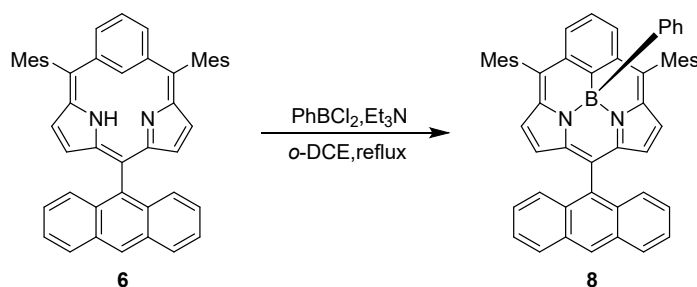

Compound **6** (20 mg, 0.030 mmol) was dissolved in dry 1,2-dichlorobenzene (5 mL) in a round-bottomed 50 mL flask containing a magnetic bar, and the resulting solution was refluxed in an inert atmosphere for about 10 min. Dry triethyl amine (0.1 mL) were added to the solution and the heating was continued for 10 min. Freshly distilled PhBCl<sub>2</sub> (0.1 mL) was added. The progress of the reaction was monitored by TLC. After the completion of the reaction, the reaction mixture was diluted with CH<sub>2</sub>Cl<sub>2</sub>, washed with water, and dried over anhydrous sodium sulfate. After the solvent was removed, the product was purified by silica-gel column chromatography (CH<sub>2</sub>Cl<sub>2</sub>/*n*-hexane as an eluent) to give **8** (10.3 mg, 0.014 mmol, 46% yield) as yellow solids.

**8**: <sup>1</sup>H NMR (500 MHz, CDCl<sub>3</sub>) δ = 8.53 (s, 1H, anthryl-H), 8.07 (d, *J* = 8.0 Hz, 1H, anthryl-H), 8.02 (d, *J* = 8.0 Hz, 1H, anthryl-H), 7.92-7.88 (m, 2H, anthryl-H), 7.45-7.42 (m, 2H, anthryl-H), 7.36 (t, 1H, phenyl-H), 7.21-7.09(m, 9H, anthryl-H+axial phenyl-H+phenyl-H), 6.99(s, 2H, Mes-*m*-H), 6.97(s, 2H, Mes-*m*-H), 6.64(d, *J* = 4.5 Hz, 2H, pyrrole-H), 6.11(d, *J* = 4.5 Hz, 2H, pyrrole-H), 2.38 (s, 6H, Me-H), 2.21 (s, 6H, Me-H), and 2.03 (s, 6H, Me-H). λ<sub>max</sub> (ε [M<sup>-1</sup>cm<sup>-1</sup>]) = 388 (24200) and 803 (1600) nm. (HR-MS (MALDI-TOF-MS): *m/z* = 665.2687, calcd for (C<sub>49</sub>H<sub>38</sub>BN<sub>2</sub>)<sup>+</sup> = 665.3131([*M*-Ph]<sup>+</sup>).

### Synthesis of 9.

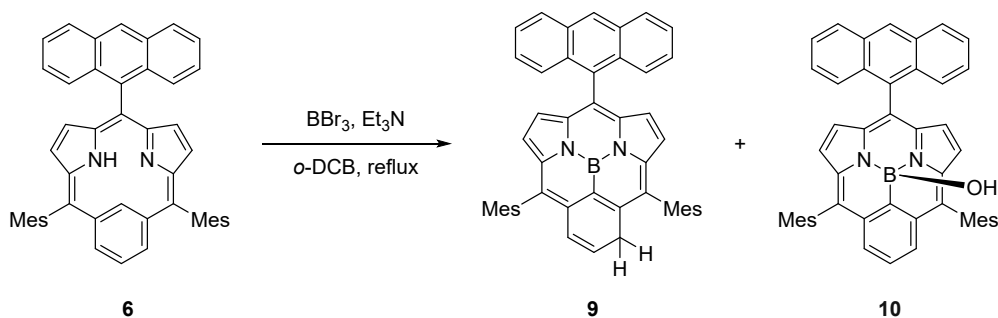

Compound **6** (20 mg, 0.030 mmol) was dissolved in dry 1,2-dichlorobenzene (5 mL) in a round-bottomed 50 mL flask containing a magnetic bar, and the resulting solution was refluxed in an inert atmosphere for about 10 min. Dry triethyl amine (0.1 mL) were added to the solution and the heating was continued for 10 min.  $\text{BBr}_3$  (0.1 mL) was added. The progress of the reaction was monitored by TLC. After the completion of the reaction, the reaction mixture was diluted with  $\text{CH}_2\text{Cl}_2$ , washed with water, and dried over anhydrous sodium sulfate. After the solvent was removed, the product was purified by silica-gel column chromatography using  $\text{CH}_2\text{Cl}_2/n$ -hexane as an eluent to give **9** (10.2 mg, 0.015 mmol, 51% yield) as red solids and **10** (4.5 mg, 0.007 mmol, 21% yield) as green solids.

**9**:  $^1\text{H NMR}$  (500 MHz,  $\text{CDCl}_3$ )  $\delta$  = 8.75 (s, 1H, anthryl-H), 8.18 (d,  $J$  = 8.5 Hz, 2H, anthryl-H), 7.58-7.54 (m, 4H, pyrrole-H+anthryl-H), 7.45-7.42 (m, 3H, pyrrole-H+anthryl-H), 7.40 (d,  $J$  = 4.5 Hz, 1H, pyrrole-H), 7.17 (t, 2H, anthryl-H), 7.15 (s, 2H, Mes-*m*-H), 7.11 (s, 2H, Mes-*m*-H), 6.67(d,  $J$  = 10.1 Hz, 1H, allyl-H), 6.25-6.21 (dt, 1H, allyl-H), 4.11 (br, 2H, allyl-H), 2.46 (s, 6H, Me-H), 2.03 (s, 6H, Me-H), and 1.98 (s, 6H, Me-H).  $\lambda_{\text{max}}$  ( $\epsilon$  [ $\text{M}^{-1}\text{cm}^{-1}$ ]) = 335 (58700), 356 (54700), 546 (29500) nm. (HR-MS (MALDI-TOF-MS):  $m/z$  = 656.2832, calcd for  $(\text{C}_{49}\text{H}_{38}\text{BN}_2)^+$  = 656.3131( $[M-H]^+$ ).

**10**:  $^1\text{H NMR}$  (500 MHz,  $\text{CDCl}_3$ )  $\delta$  = 8.59 (s, 1H, anthryl-H), 8.35 (d,  $J$  = 8.5 Hz, 1H, anthryl-H), 8.09-8.07 (m, 2H, anthryl-H), 7.64 (d,  $J$  = 8.5 Hz, 1H, anthryl-H), 7.52-7.50 (m, 2H, anthryl-H), 7.44 (t, 1H, phenyl-H), 7.31-7.21 (m, 4H, anthryl-H+phenyl-H), 7.04 (s, 2H, Mes-*m*-H), 6.97 (s, 2H, Mes-*m*-H), 6.71 (d,  $J$  = 5.0 Hz, 2H, pyrrole-H), 6.20 (d,  $J$  = 5.0 Hz, 2H, pyrrole-H), 2.43 (s, 6H, Me-H), 2.39

(s, 6H, Me-H), and 1.99 (s, 6H, Me-H) ppm. (The OH was not observed.) (HR-MS (MALDI-TOF-MS):  $m/z = 664.3184$ , calcd for  $(C_{49}H_{38}BN_2)^+ = 664.3159$  ( $[M-OH]^+$ ).

### Synthesis of 10.

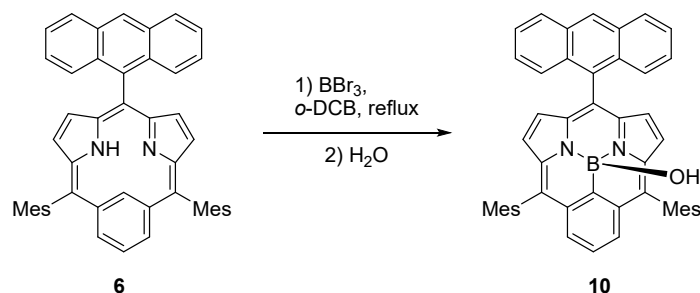

Compound **6** (20 mg, 0.030 mmol) was dissolved in dry 1,2-dichlorobenzene (5 mL) in a round-bottomed 50 mL flask containing a magnetic bar, and the resulting solution was refluxed in an inert atmosphere for about 10 min.  $BBr_3$  (0.1 mL) was added. The progress of the reaction was monitored by TLC. After the completion of the reaction, the reaction mixture was diluted with  $CH_2Cl_2$ , washed with water, and dried over anhydrous sodium sulfate. After the solvent was removed, the product was purified by column chromatography on silica-gel ( $CH_2Cl_2/n$ -hexane as an eluent) to give **10** (19.5 mg, 0.029 mmol, 95% yield).

### Synthesis of 11.

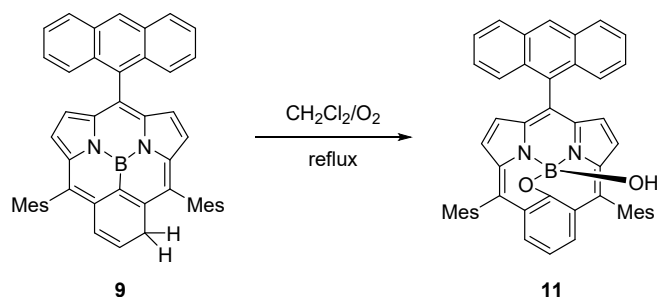

Compound **9** (20 mg, 0.030 mmol) was dissolved in dry  $CH_2Cl_2$  (10 mL) in a round-bottomed 50 mL flask containing a magnetic bar, and the resulting solution was refluxed in the air for about 48 h. The progress of the reaction was

monitored by TLC. After the completion of the reaction, the reaction mixture was diluted with CH<sub>2</sub>Cl<sub>2</sub>, washed with water, and dried over anhydrous sodium sulfate. After the solvent was removed, the product was purified by column chromatography on silica-gel (CH<sub>2</sub>Cl<sub>2</sub>/*n*-hexane as an eluent) to give **11** (20.3 mg, 0.029 mmol, 97% yield).

**11**: <sup>1</sup>H NMR (500 MHz, CDCl<sub>3</sub>) δ = 8.64 (d, *J* = 8.5 Hz, 1H, anthryl-H), 8.56 (s, 1H, anthryl-H), 8.10-8.05 (m, 2H, anthryl-H), 7.52-7.50 (m, 2H, anthryl-H), 7.43-7.39 (m, 2H, anthryl-H), 7.26 (m, 1H, anthryl-H), 7.04 (s, 2H, Mes-*m*-H), 6.99 (s, 2H, Mes-*m*-H), 6.89 (t, 1H, phenyl-H), 6.66-6.64 (m, 4H, phenyl-H+pyrrole-H), 6.17 (d, *J* = 4.5 Hz, 2H, pyrrole-H), 2.47 (s, 6H, Me-H), 2.38 (s, 6H, Me-H), and 2.00 (s, 6H, Me-H). (The OH was not observed.) λ<sub>max</sub> (ε [M<sup>-1</sup>cm<sup>-1</sup>]) = 388 (28100) and 654 (3400) nm. (HR-MS (MALDI-TOF-MS): *m/z* = 698.3118, calcd for (C<sub>49</sub>H<sub>39</sub>BN<sub>2</sub>O<sub>2</sub>)<sup>+</sup> = 698.3107 ([M]<sup>+</sup>).

### Synthesis of **12**.

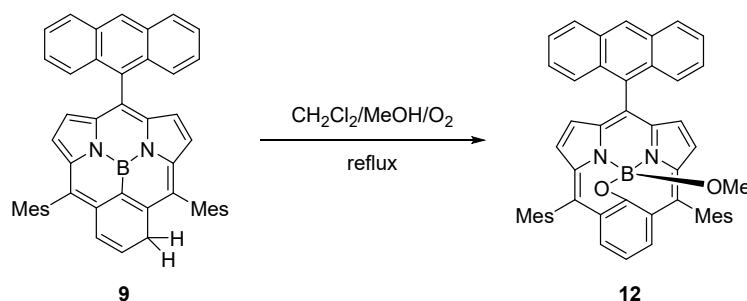

Compound **9** (20 mg, 0.030 mmol) was dissolved in dry CH<sub>2</sub>Cl<sub>2</sub>/MeOH (10/2 mL) in a round-bottomed 50 mL flask containing a magnetic bar, and the resulting solution was refluxed in the air for 48 h. The progress of the reaction was monitored by TLC. After the completion of the reaction, the reaction mixture was diluted with CH<sub>2</sub>Cl<sub>2</sub>, washed with water, and dried over anhydrous sodium sulfate. After the solvent was removed, the product was purified by column chromatography on silica-gel (CH<sub>2</sub>Cl<sub>2</sub>/*n*-hexane as an eluent) to give **12** (18.4 mg, 0.026 mmol, 86% yield).

**12**: <sup>1</sup>H NMR (500 MHz, CDCl<sub>3</sub>) δ = 8.59 (d, *J* = 8.5 Hz, 1H, anthryl-H), 8.56 (s,

1H, anthryl-H), 8.07-8.05 (m, 2H, anthryl-H), 7.52-7.50 (m, 2H, anthryl-H), 7.45-7.40 (m, 2H, anthryl-H), 7.26 (m, 1H, anthryl-H), 7.04 (s, 2H, Mes-*m*-H), 6.99 (s, 2H, Mes-*m*-H), 6.89 (t, 1H, phenyl-H), 6.65-6.63 (m, 4H, phenyl-H+pyrrole-H), 6.20 (d,  $J = 4.5$  Hz, 2H, pyrrole-H), 3.22 (s, 3H, MeO-H), 2.50 (s, 6H, Me-H), 2.38 (s, 6H, Me-H), and 2.01 (s, 6H, Me-H).  $\lambda_{\max}$  ( $\epsilon$  [ $M^{-1}cm^{-1}$ ]) = 388 (31800) and 652 (3900) nm. (HR-MS (MALDI-TOF-MS):  $m/z = 712.3277$ , calcd for  $(C_{50}H_{41}BN_2O_2)^+ = 712.3264$  ( $[M]^+$ ).

### 3. Spectra of Compounds

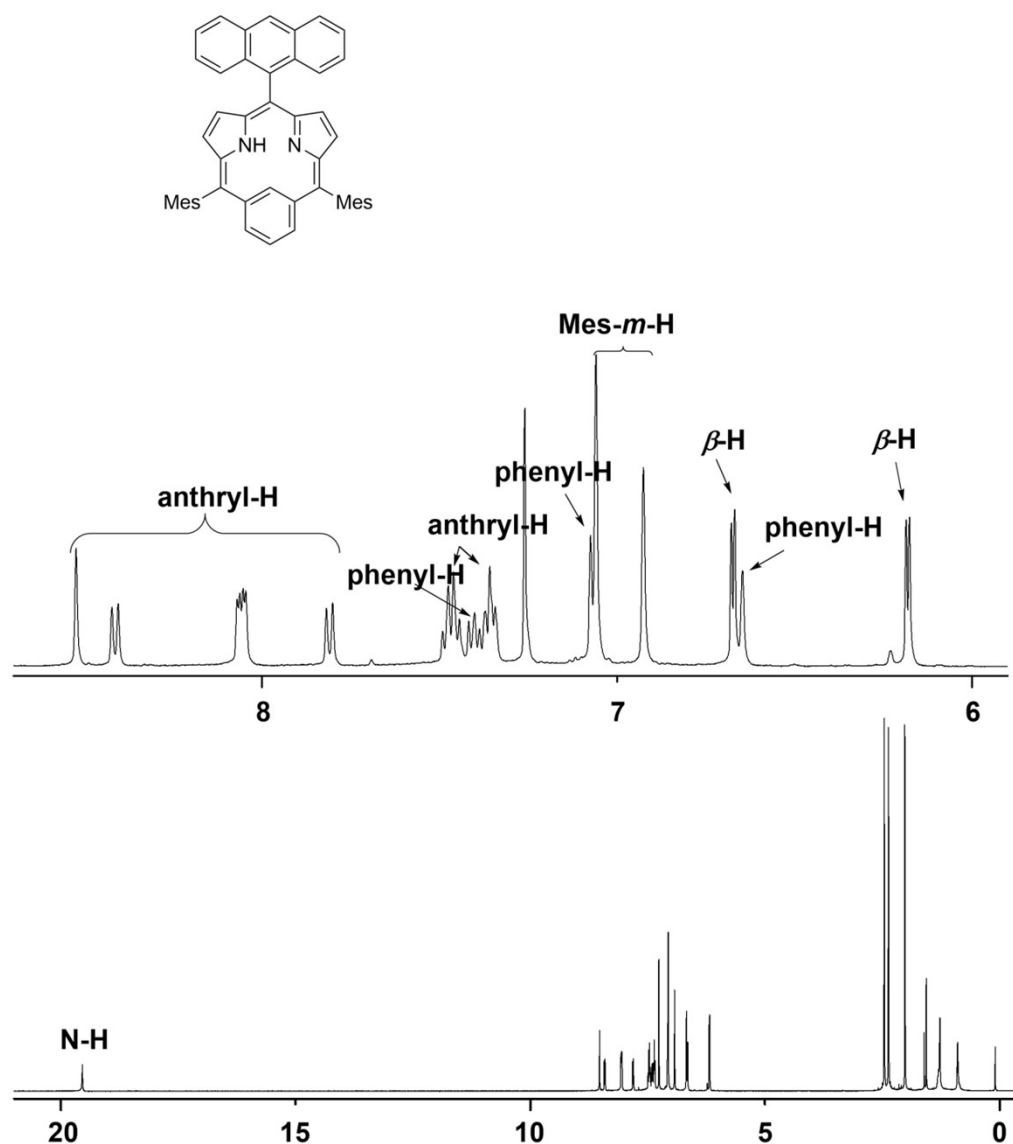

Figure S1.  $^1H$  NMR spectrum of **6** in  $CDCl_3$ .



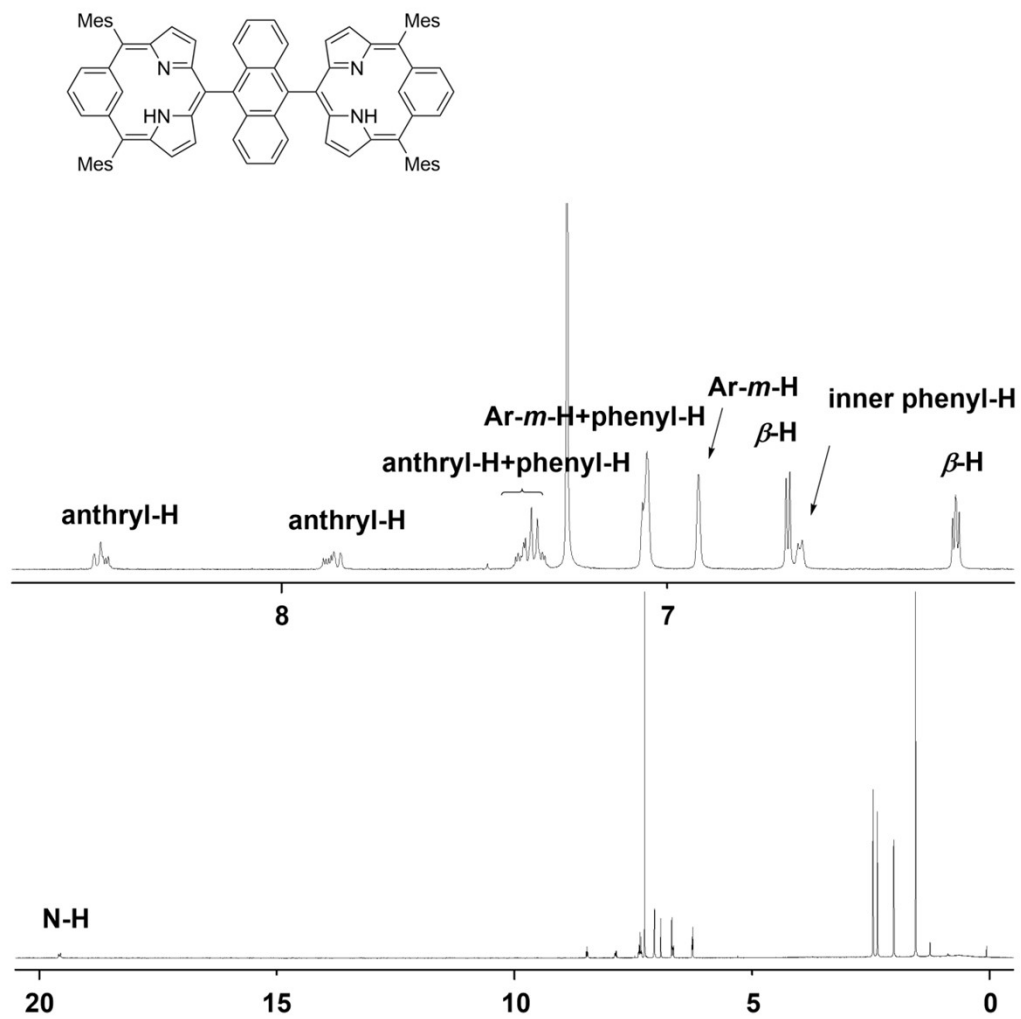

Figure S2. <sup>1</sup>H NMR spectrum of **7** in CDCl<sub>3</sub>.

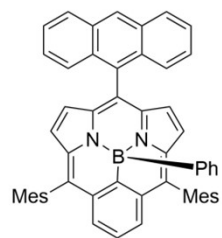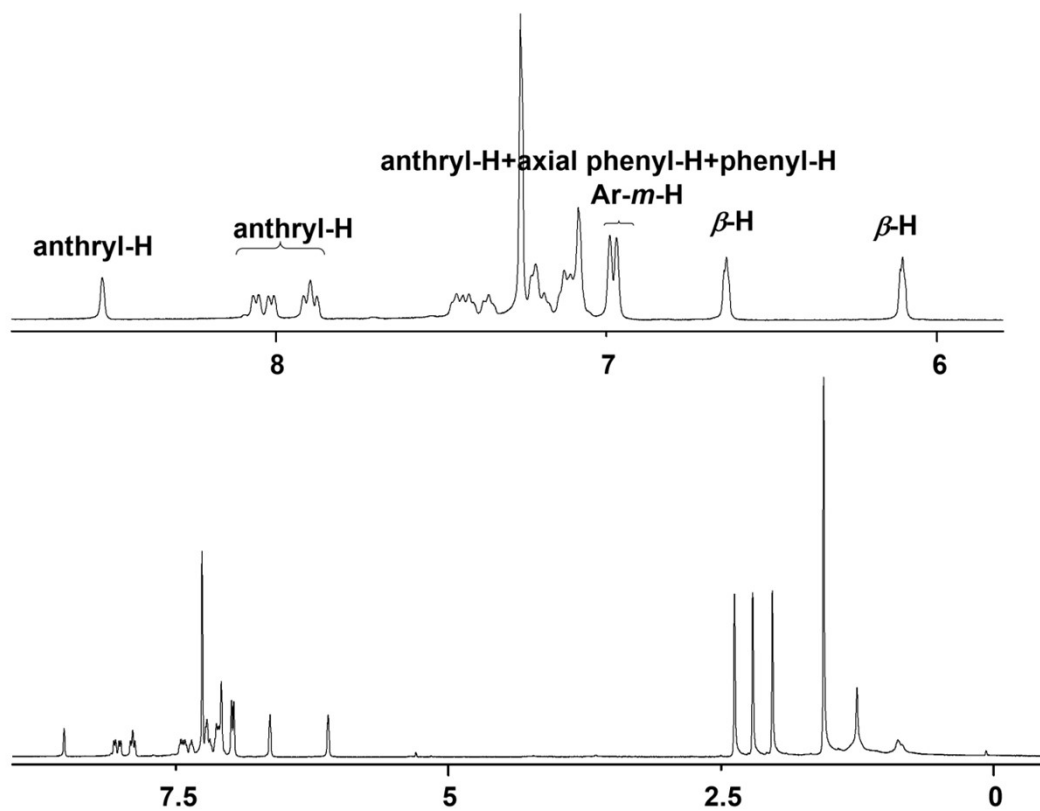

Figure S3. <sup>1</sup>H NMR spectrum of 8 in CDCl<sub>3</sub>.

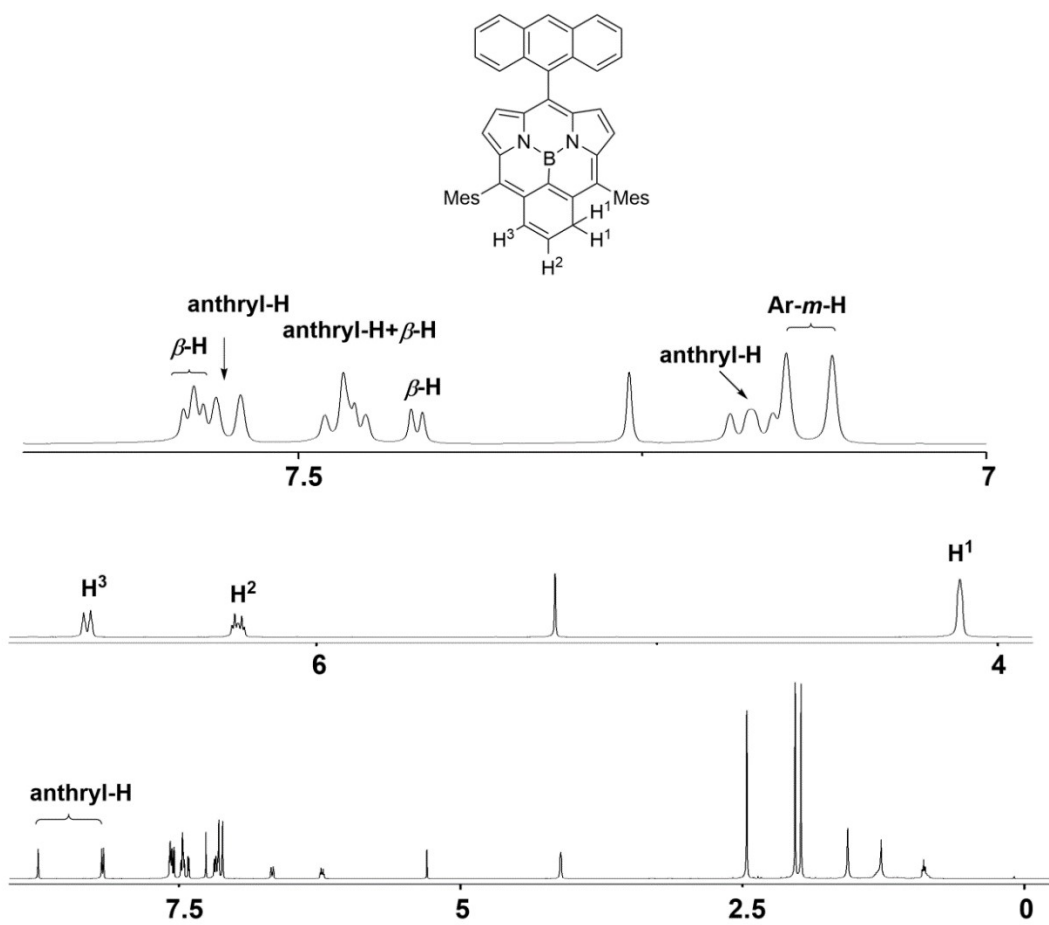

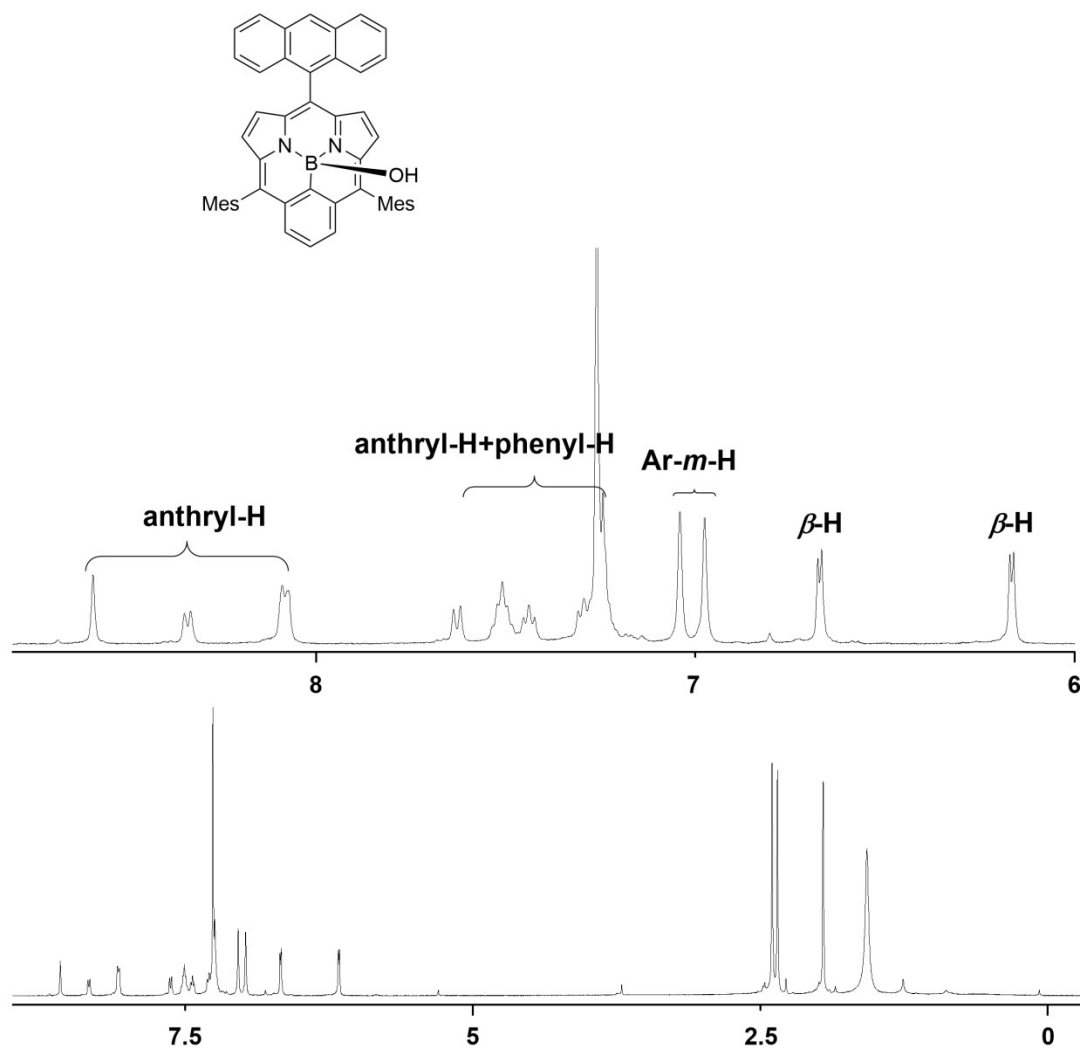

**Figure S5.** <sup>1</sup>H NMR spectrum of **10** in CDCl<sub>3</sub>.

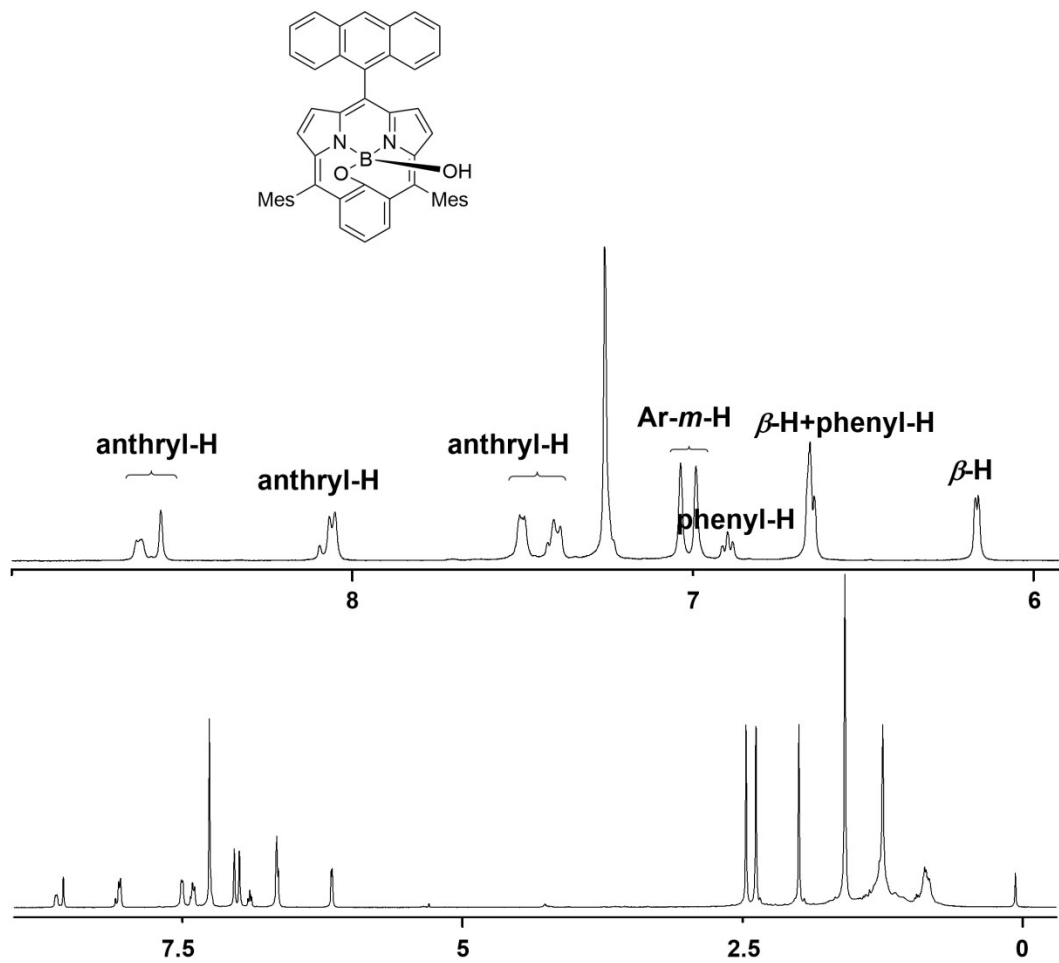

**Figure S6.** <sup>1</sup>H NMR spectrum of **11** in CDCl<sub>3</sub>.

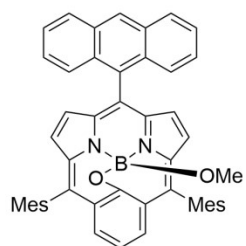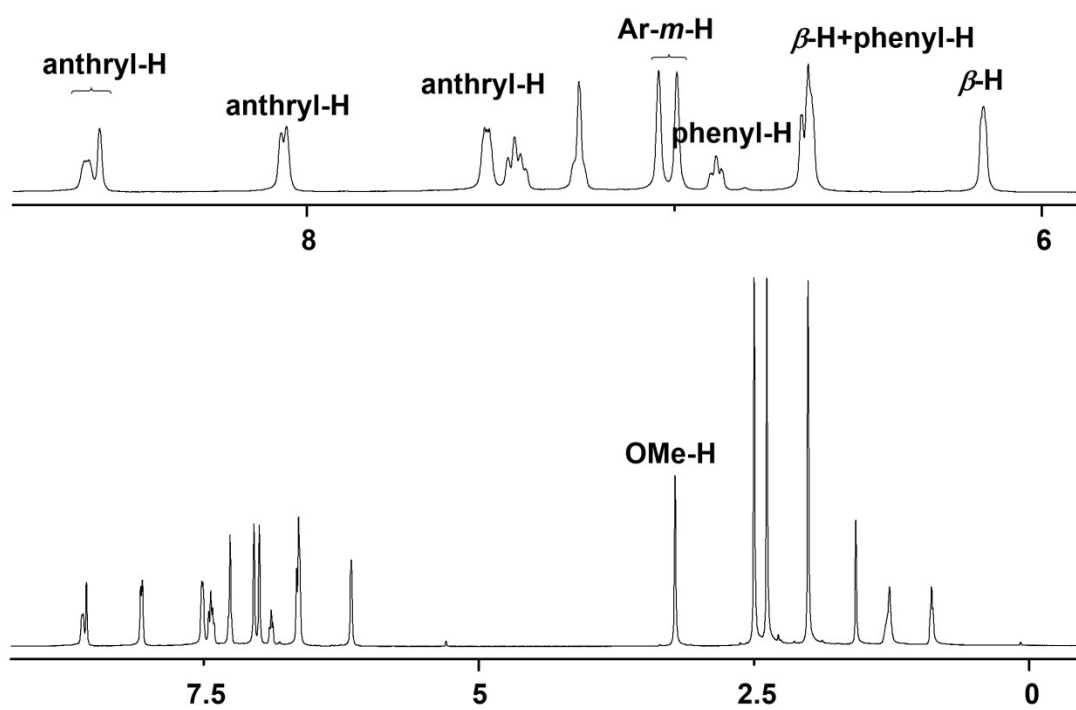

Figure S7.  $^1\text{H}$  NMR spectrum of **12** in  $\text{CDCl}_3$ .

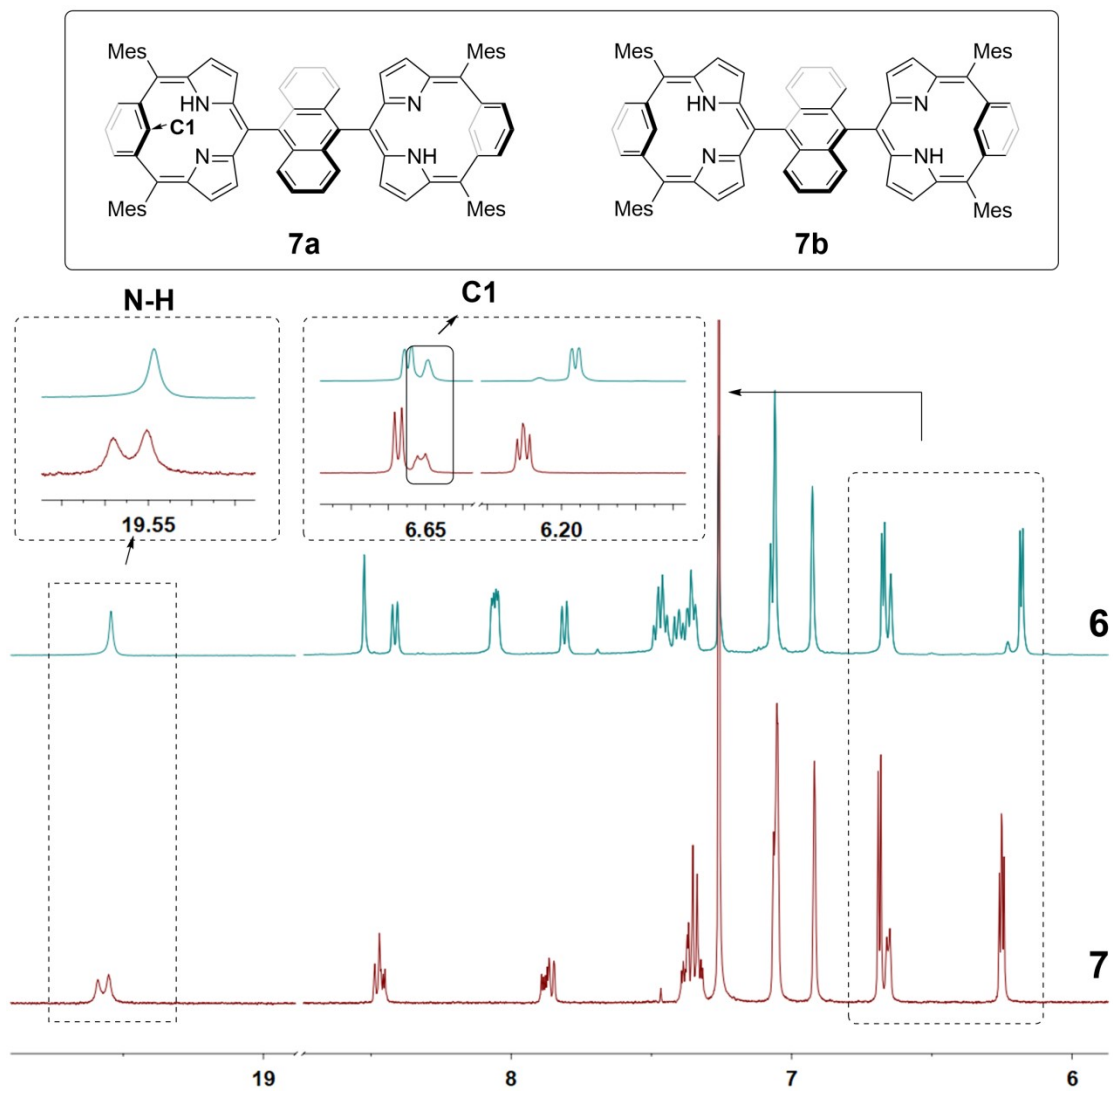

**Figure S8.** Comparison of  $^1\text{H}$  NMR spectra of **6** and **7** in  $\text{CDCl}_3$ .

## Mass Spectra

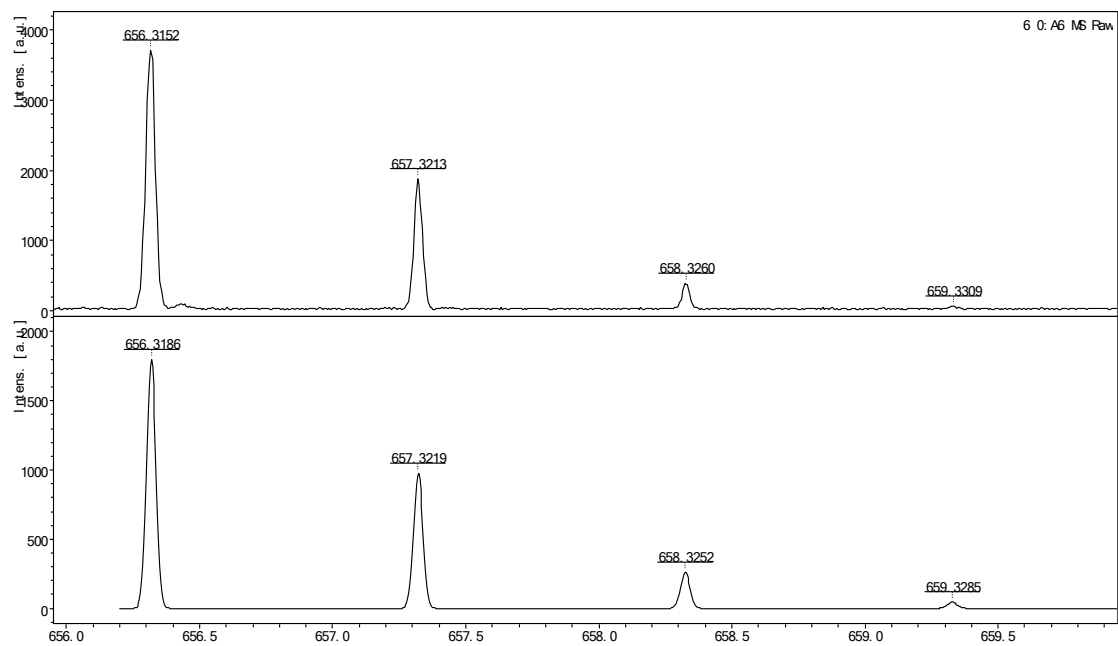

Figure S9. MALDI-TOF-MS of 6. (Top: observed; Bottom: simulated)

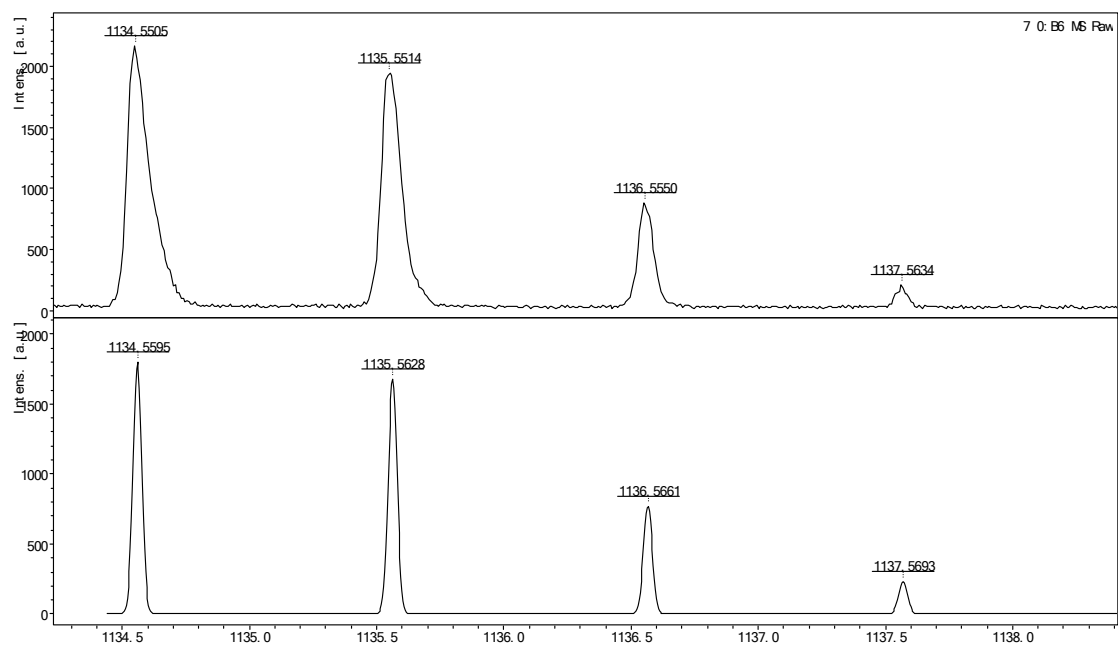

Figure S10. MALDI-TOF-MS of 7. (Top: observed; Bottom: simulated)



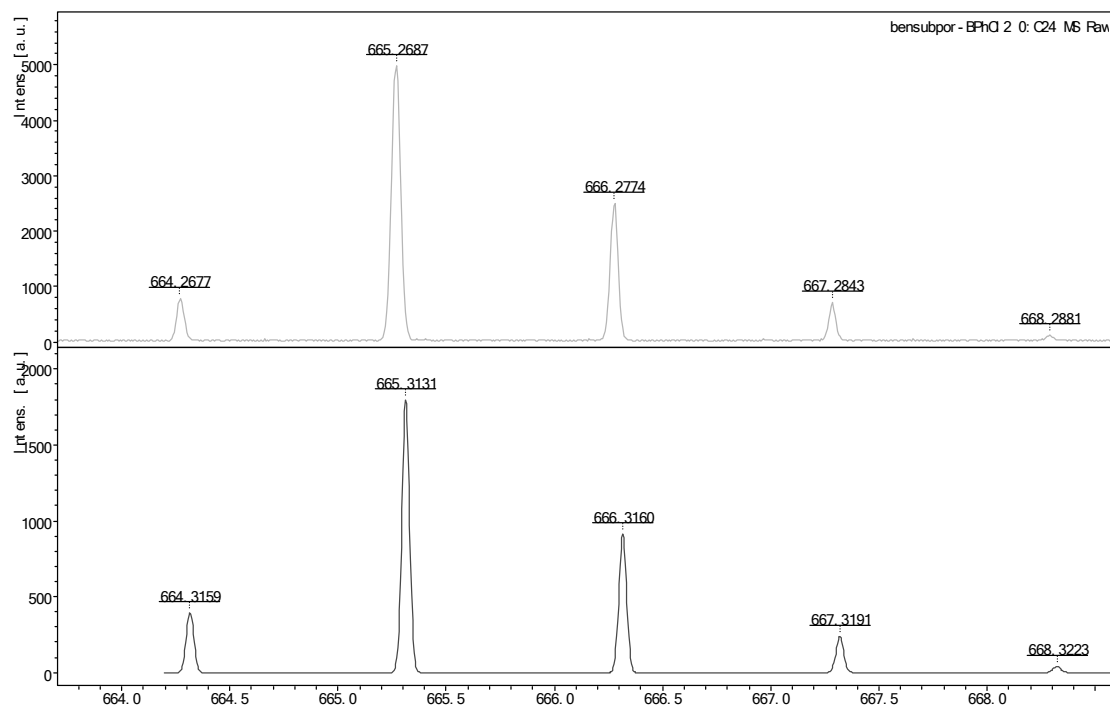

Figure S11. MALDI-TOF-MS of 8. (Top: observed; Bottom: simulated)

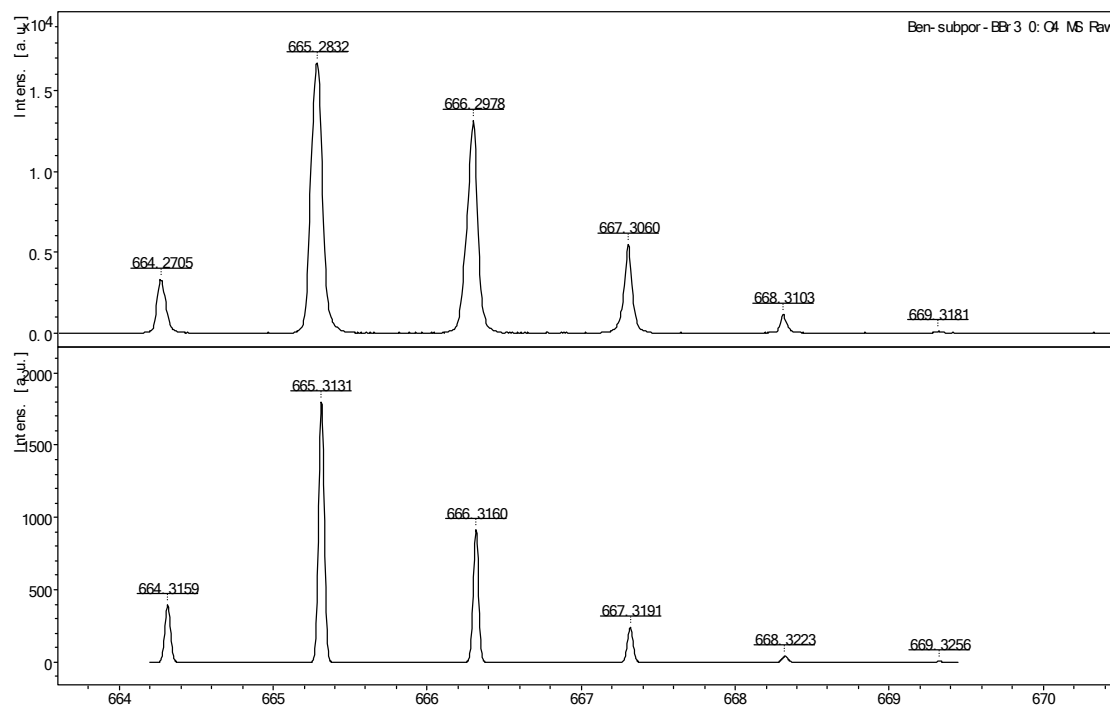

Figure S12. MALDI-TOF-MS of 9. (Top: observed; Bottom: simulated)

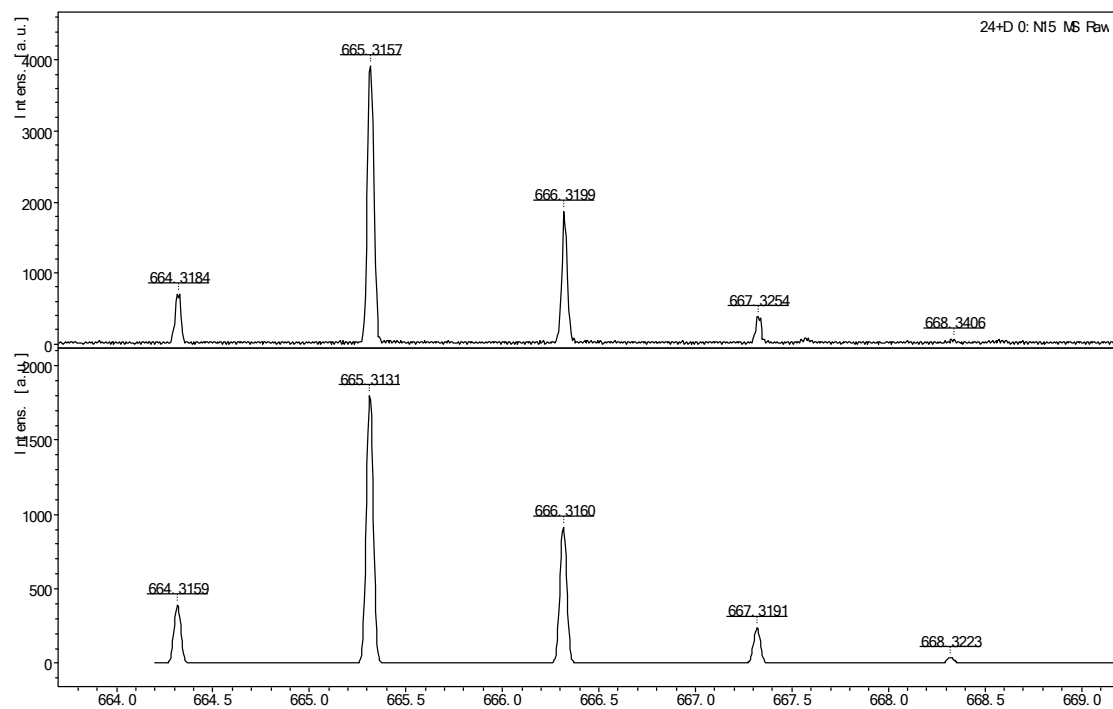

Figure S13. MALDI-TOF-MS of 10. (Top: observed; Bottom: simulated)

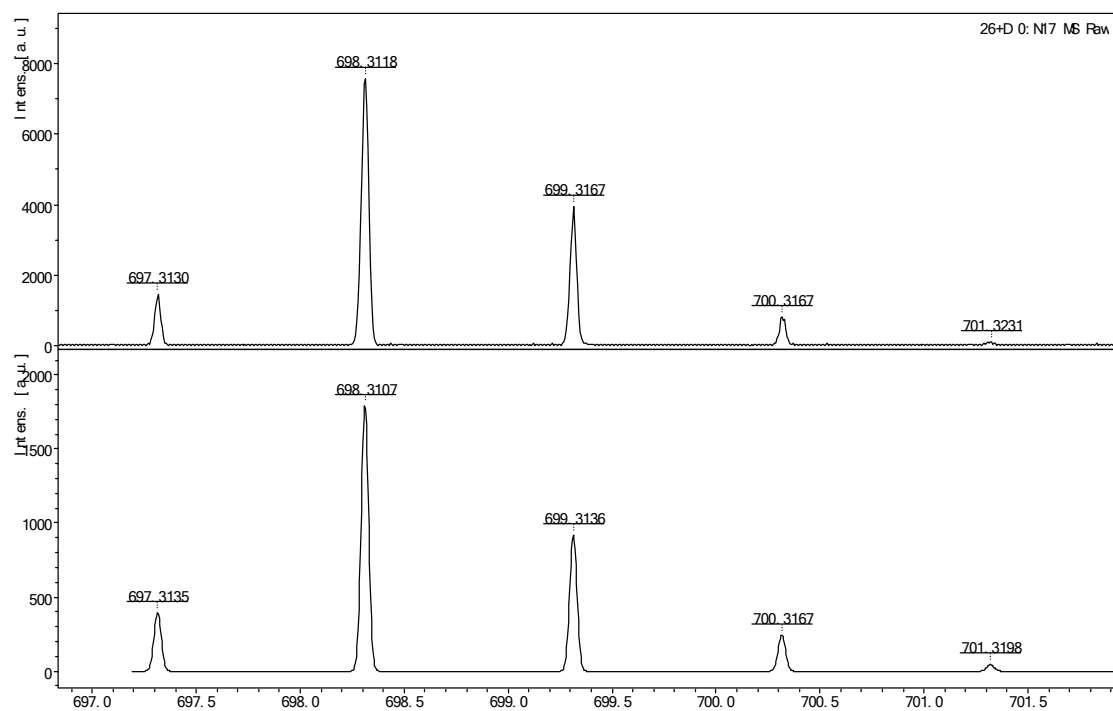

Figure S14. MALDI-TOF-MS of 11. (Top: observed; Bottom: simulated)

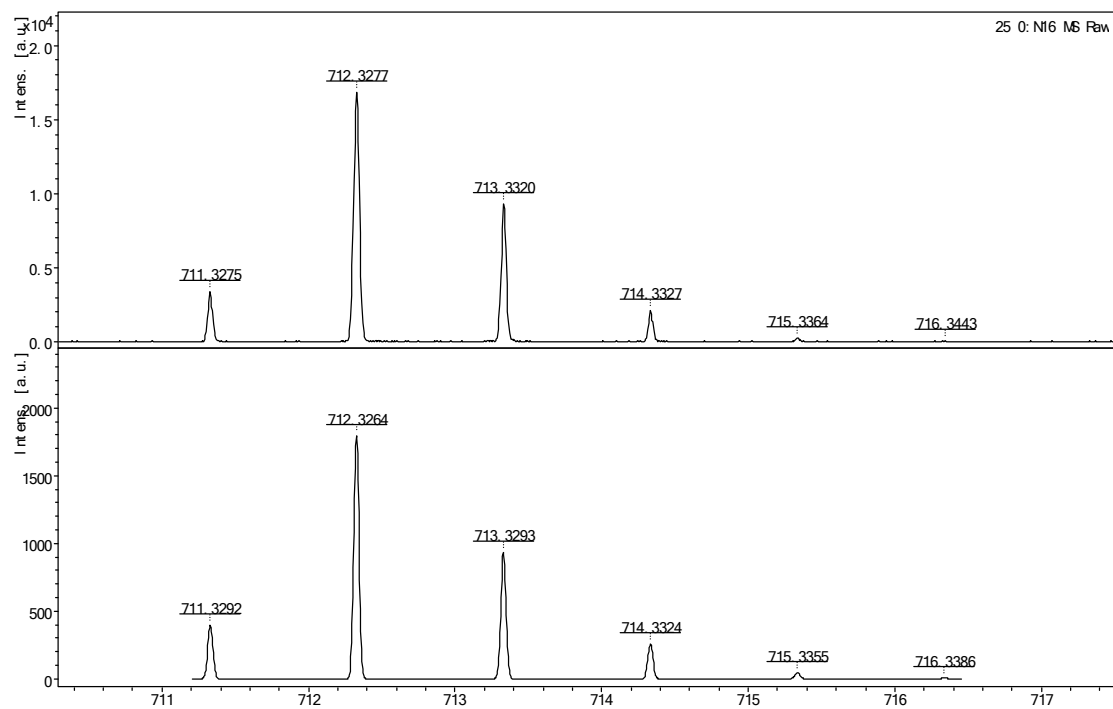

**Figure S15.** MALDI-TOF-MS of **12**. (Top: observed; Bottom: simulated)

## 4. Electrochemical Data

Cyclic voltammograms and differential pulse voltammograms were measured in DCM with 0.1 M  $n\text{Bu}_4\text{NPF}_6$ . Potentials were determined vs ferrocene/ferrocenium ion by differential pulse voltammograms. Working electrode: glassy carbon. Counter electrode: Pt wire. Reference electrode:  $\text{AgNO}_3$ .

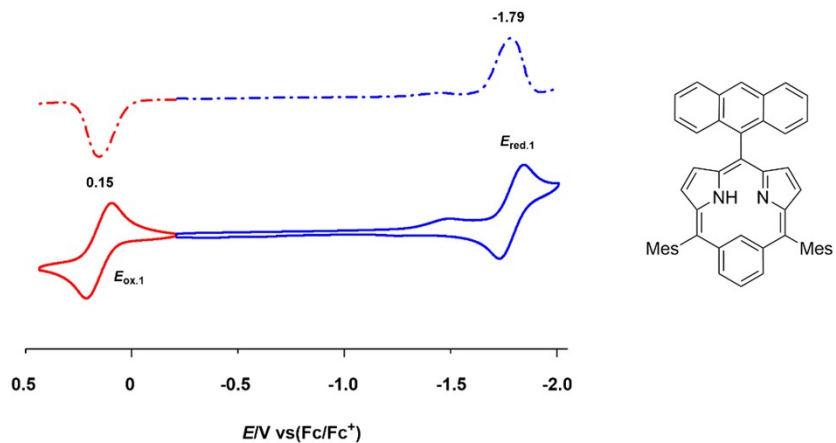

**Figure S16.** Cyclic voltammogram and differential pulse voltammogram of **6**.

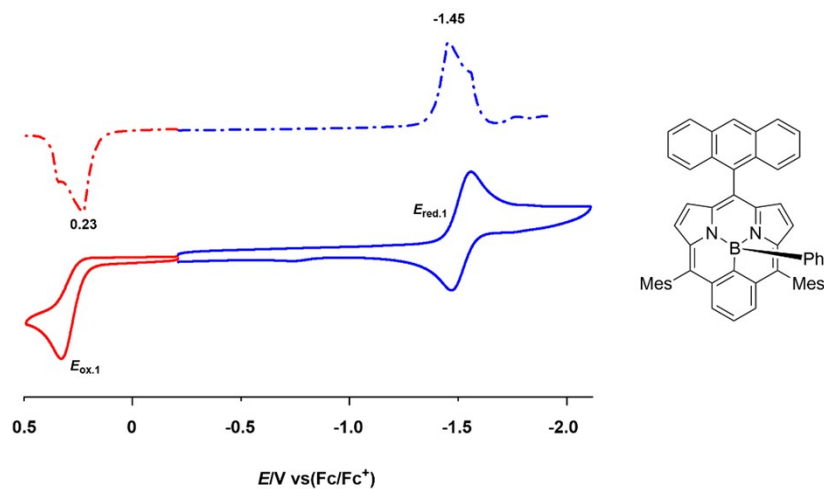

**Figure S17.** Cyclic voltammogram and differential pulse voltammogram of **8**.

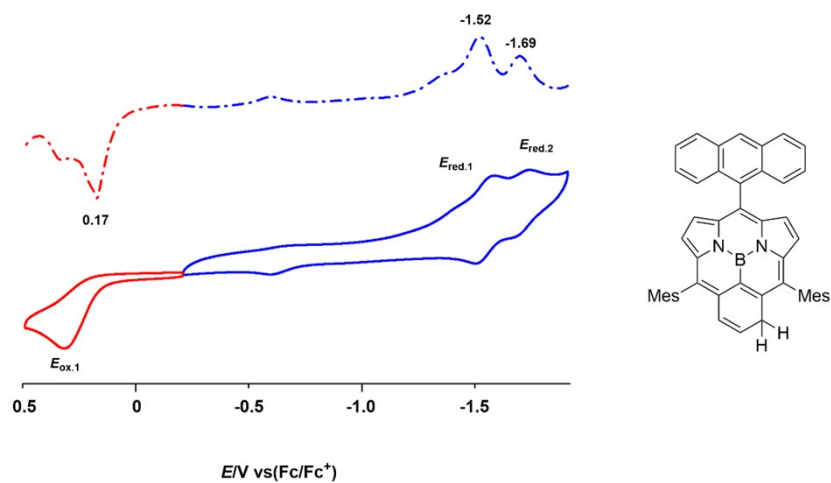

**Figure S18.** Cyclic voltammogram and differential pulse voltammogram of **9**.

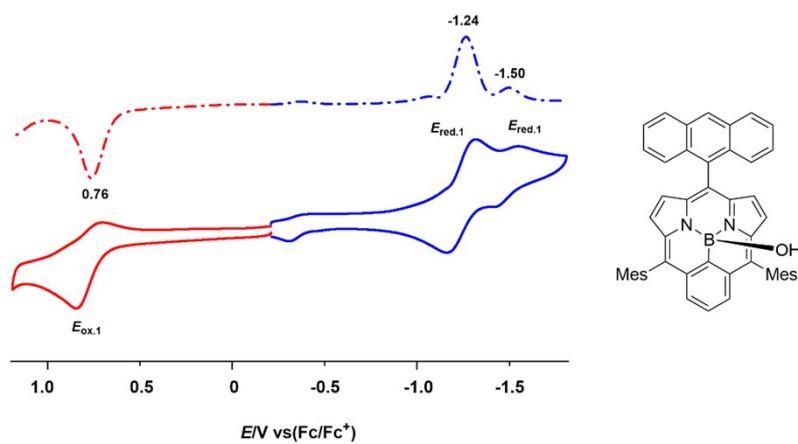

**Figure S19.** Cyclic voltammogram and differential pulse voltammogram of **10**.

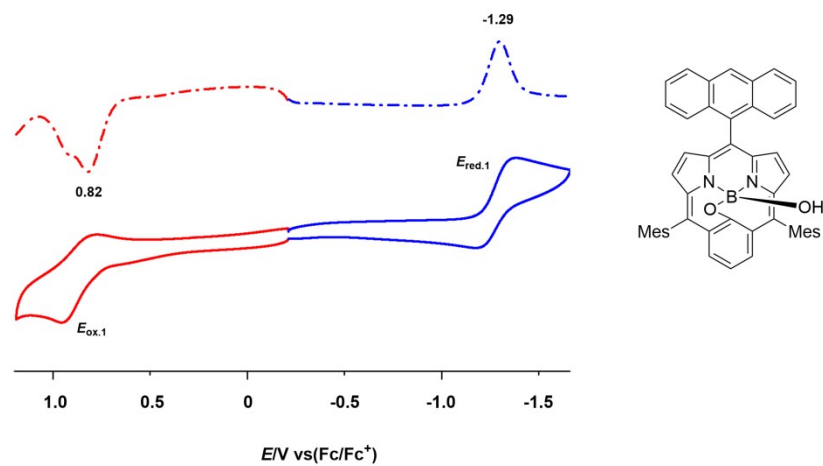

**Figure S20.** Cyclic voltammogram and differential pulse voltammogram of **11**.

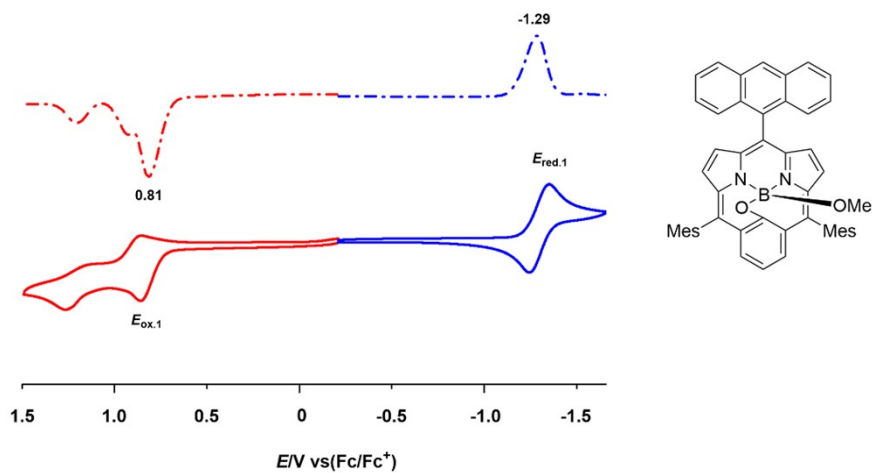

**Figure S21.** Cyclic voltammogram and differential pulse voltammogram of **12**.

**Table S1.** Summary of the electrochemical potentials (V) and HOMO–LUMO gaps (eV).

| samples   | $E_{\text{ox},1}$ | $E_{\text{red},1}$ | $E_{\text{red},2}$ | $\Delta E_{\text{HL}}^{[b]}$ |
|-----------|-------------------|--------------------|--------------------|------------------------------|
| <b>6</b>  | 0.15              | -1.79              | --                 | 1.94                         |
| <b>8</b>  | 0.23              | -1.45              | --                 | 1.68                         |
| <b>9</b>  | 0.17              | -1.52              | -1.69              | 1.69                         |
| <b>10</b> | 0.76              | -1.24              | -1.50              | 2.00                         |
| <b>11</b> | 0.82              | -1.29              | --                 | 2.11                         |
| <b>12</b> | 0.81              | -1.29              | --                 | 2.10                         |

<sup>a</sup>Irreversible peaks. <sup>b</sup> $\Delta E_{\text{HL}} = e (E_{\text{ox},1} - E_{\text{red},1})$  [eV]

## 5. X-Ray Crystal Data

**Table S2.** Crystal data and structure refinement for **6**.

|                                   |                                             |                             |
|-----------------------------------|---------------------------------------------|-----------------------------|
| Identification code               | exp_3719                                    |                             |
| Empirical formula                 | C51 H43 N3                                  |                             |
| Formula weight                    | 697.88                                      |                             |
| Temperature                       | 100.01(10) K                                |                             |
| Wavelength                        | 1.54184 Å                                   |                             |
| Crystal system                    | Monoclinic                                  |                             |
| Space group                       | P 1 21/n 1                                  |                             |
| Unit cell dimensions              | a = 12.0996(5) Å                            | $\alpha = 90^\circ$ .       |
|                                   | b = 10.9016(5) Å                            | $\beta = 96.378(4)^\circ$ . |
|                                   | c = 29.2496(12) Å                           | $\gamma = 90^\circ$ .       |
| Volume                            | 3834.3(3) Å <sup>3</sup>                    |                             |
| Z                                 | 4                                           |                             |
| Density (calculated)              | 1.209 Mg/m <sup>3</sup>                     |                             |
| Absorption coefficient            | 0.535 mm <sup>-1</sup>                      |                             |
| F(000)                            | 1480                                        |                             |
| Crystal size                      | 0.3 x 0.1 x 0.1 mm <sup>3</sup>             |                             |
| Theta range for data collection   | 3.040 to 66.597°.                           |                             |
| Index ranges                      | -14 ≤ h ≤ 8, -12 ≤ k ≤ 12, -29 ≤ l ≤ 34     |                             |
| Reflections collected             | 13633                                       |                             |
| Independent reflections           | 6772 [R(int) = 0.0534]                      |                             |
| Completeness to theta = 66.597°   | 99.9 %                                      |                             |
| Absorption correction             | Semi-empirical from equivalents             |                             |
| Max. and min. transmission        | 1.00000 and 0.70836                         |                             |
| Refinement method                 | Full-matrix least-squares on F <sup>2</sup> |                             |
| Data / restraints / parameters    | 6772 / 0 / 494                              |                             |
| Goodness-of-fit on F <sup>2</sup> | 1.047                                       |                             |
| Final R indices [I > 2σ(I)]       | R1 = 0.0575, wR2 = 0.1249                   |                             |
| R indices (all data)              | R1 = 0.0889, wR2 = 0.1414                   |                             |
| Extinction coefficient            | n/a                                         |                             |
| Largest diff. peak and hole       | 0.266 and -0.458 e.Å <sup>-3</sup>          |                             |
| CCDC number                       | 2379624                                     |                             |

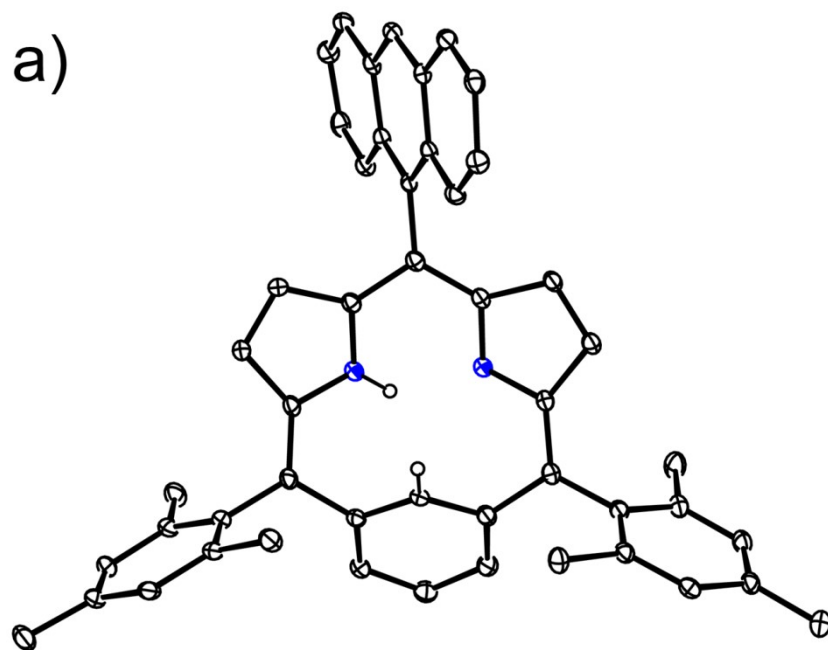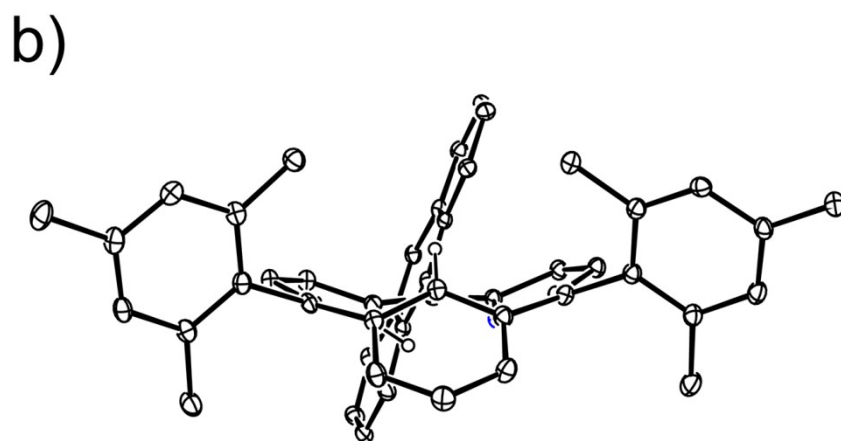

**Figure S22.** X-ray crystal structure of **6**. (a) Top view and (b) side view. The thermal ellipsoids are 30% probability level.

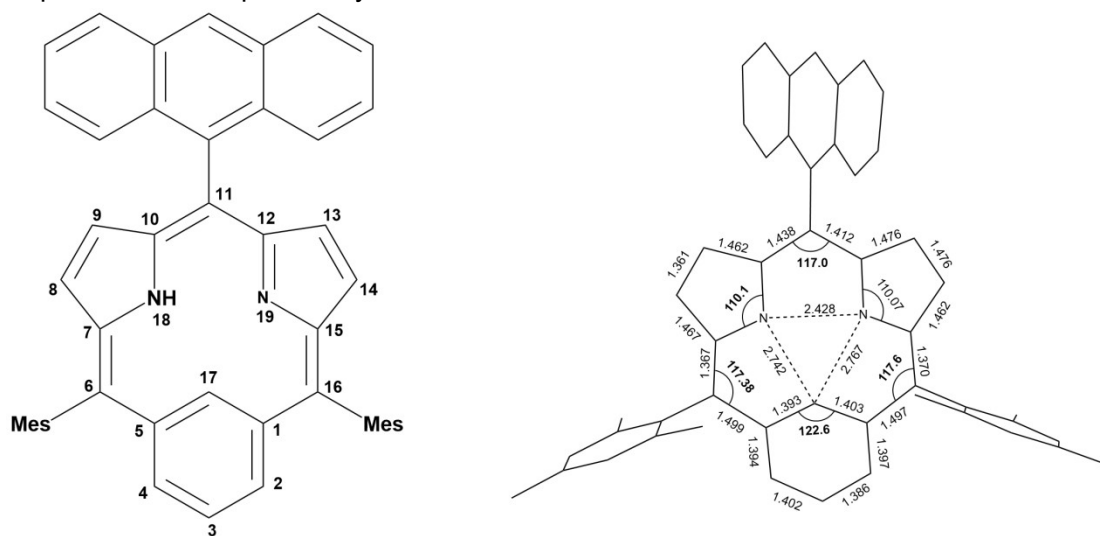

**Figure S23.** Structural analysis of **6**.



**Table S3.** Crystal data and structure refinement for **8**.

|                                   |                                             |                              |
|-----------------------------------|---------------------------------------------|------------------------------|
| Identification code               | exp_3472_sq                                 |                              |
| Empirical formula                 | C55 H43 B N2                                |                              |
| Formula weight                    | 742.72                                      |                              |
| Temperature                       | 100.01(10) K                                |                              |
| Wavelength                        | 1.54184 Å                                   |                              |
| Crystal system                    | Triclinic                                   |                              |
| Space group                       | P-1                                         |                              |
| Unit cell dimensions              | a = 12.2357(4) Å                            | $\alpha = 78.284(3)^\circ$ . |
|                                   | b = 13.4613(5) Å                            | $\beta = 77.397(3)^\circ$ .  |
|                                   | c = 14.9649(5) Å                            | $\gamma = 76.902(3)^\circ$ . |
| Volume                            | 2312.08(15) Å <sup>3</sup>                  |                              |
| Z                                 | 2                                           |                              |
| Density (calculated)              | 1.067 Mg/m <sup>3</sup>                     |                              |
| Absorption coefficient            | 0.464 mm <sup>-1</sup>                      |                              |
| F(000)                            | 784                                         |                              |
| Crystal size                      | 0.2 x 0.2 x 0.2 mm <sup>3</sup>             |                              |
| Theta range for data collection   | 3.066 to 66.600°.                           |                              |
| Index ranges                      | -14<=h<=14, -16<=k<=14, -17<=l<=13          |                              |
| Reflections collected             | 14849                                       |                              |
| Independent reflections           | 8162 [R(int) = 0.0181]                      |                              |
| Completeness to theta = 66.600°   | 100.0 %                                     |                              |
| Absorption correction             | Semi-empirical from equivalents             |                              |
| Max. and min. transmission        | 1.00000 and 0.89352                         |                              |
| Refinement method                 | Full-matrix least-squares on F <sup>2</sup> |                              |
| Data / restraints / parameters    | 8162 / 0 / 529                              |                              |
| Goodness-of-fit on F <sup>2</sup> | 1.036                                       |                              |
| Final R indices [I>2sigma(I)]     | R1 = 0.0406, wR2 = 0.0999                   |                              |
| R indices (all data)              | R1 = 0.0460, wR2 = 0.1039                   |                              |
| Extinction coefficient            | n/a                                         |                              |
| Largest diff. peak and hole       | 0.689 and -0.254 e.Å <sup>-3</sup>          |                              |
| CCDC number                       | 2379625                                     |                              |

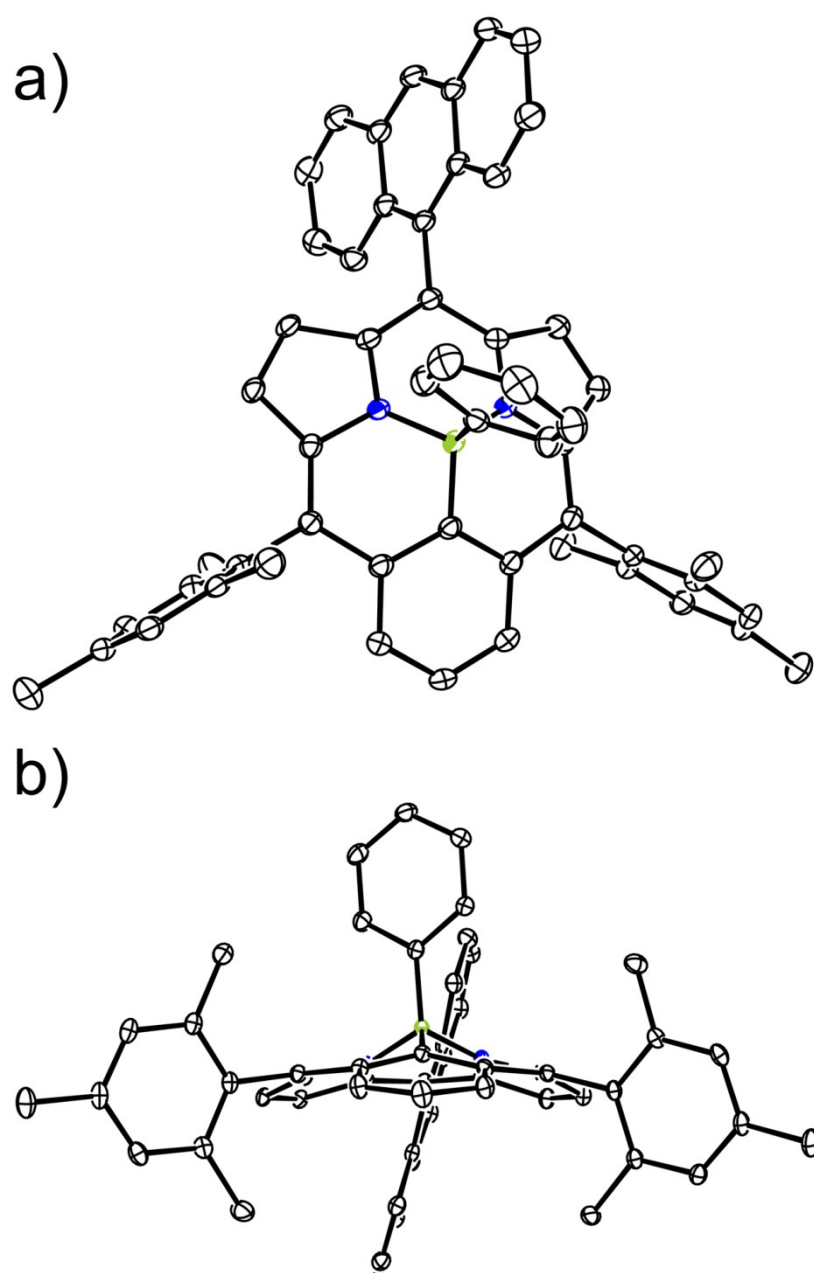

**Figure S24.** X-ray crystal structure of **8**. (a) Top view and (b) side view. The thermal ellipsoids are 30% probability level.

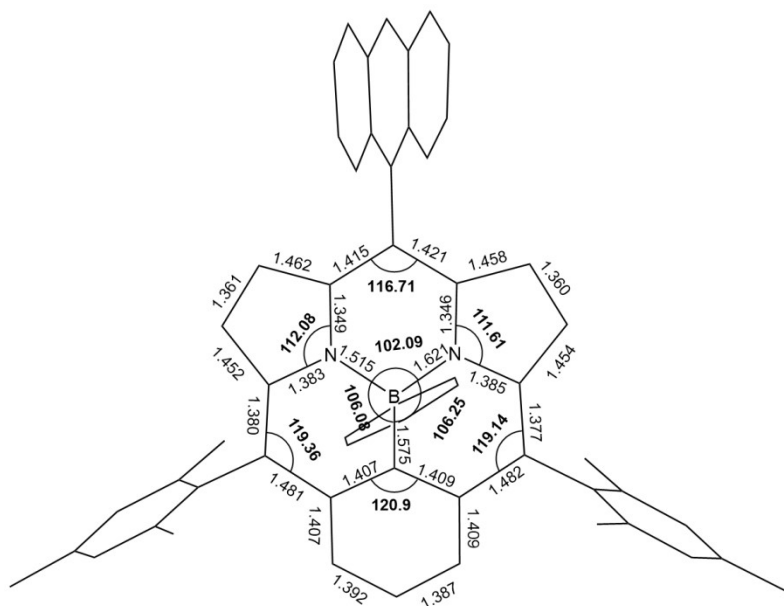

**Figure S25.** Structural analysis of **8**.

**Table S4.** Crystal data and structure refinement for **9**.

|                                   |                                             |                               |
|-----------------------------------|---------------------------------------------|-------------------------------|
| Identification code               | exp_3473_sq                                 |                               |
| Empirical formula                 | C49 H39 B N2                                |                               |
| Formula weight                    | 666.63                                      |                               |
| Temperature                       | 100.01(10) K                                |                               |
| Wavelength                        | 1.54184 Å                                   |                               |
| Crystal system                    | Triclinic                                   |                               |
| Space group                       | P-1                                         |                               |
| Unit cell dimensions              | a = 11.6677(12) Å                           | $\alpha = 103.399(7)^\circ$ . |
|                                   | b = 12.7694(11) Å                           | $\beta = 109.908(8)^\circ$ .  |
|                                   | c = 14.5328(8) Å                            | $\gamma = 94.935(7)^\circ$ .  |
| Volume                            | 1948.0(3) Å <sup>3</sup>                    |                               |
| Z                                 | 2                                           |                               |
| Density (calculated)              | 1.137 Mg/m <sup>3</sup>                     |                               |
| Absorption coefficient            | 0.495 mm <sup>-1</sup>                      |                               |
| F(000)                            | 704                                         |                               |
| Crystal size                      | 0.05 x 0.05 x 0.05 mm <sup>3</sup>          |                               |
| Theta range for data collection   | 3.368 to 66.600°.                           |                               |
| Index ranges                      | -13<=h<=9, -14<=k<=15, -17<=l<=17           |                               |
| Reflections collected             | 11838                                       |                               |
| Independent reflections           | 6887 [R(int) = 0.0516]                      |                               |
| Completeness to theta = 66.600°   | 99.9 %                                      |                               |
| Absorption correction             | Semi-empirical from equivalents             |                               |
| Max. and min. transmission        | 1.00000 and 0.76183                         |                               |
| Refinement method                 | Full-matrix least-squares on F <sup>2</sup> |                               |
| Data / restraints / parameters    | 6887 / 0 / 475                              |                               |
| Goodness-of-fit on F <sup>2</sup> | 1.047                                       |                               |
| Final R indices [I>2sigma(I)]     | R1 = 0.0815, wR2 = 0.2160                   |                               |
| R indices (all data)              | R1 = 0.1166, wR2 = 0.2447                   |                               |
| Extinction coefficient            | n/a                                         |                               |
| Largest diff. peak and hole       | 0.541 and -0.265 e.Å <sup>-3</sup>          |                               |
| CCDC number                       | 2379626                                     |                               |

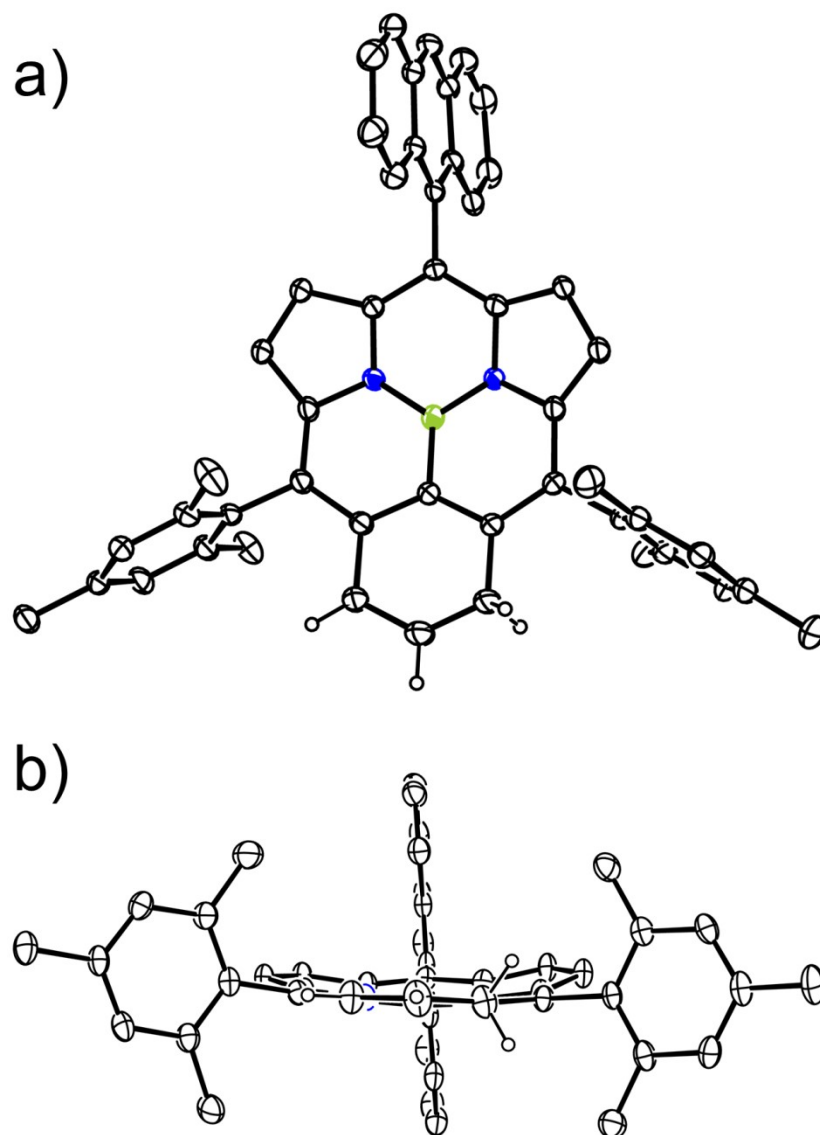

**Figure S26.** X-ray crystal structure of **9**. (a) Top view and (b) side view. The thermal ellipsoids are 30% probability level.

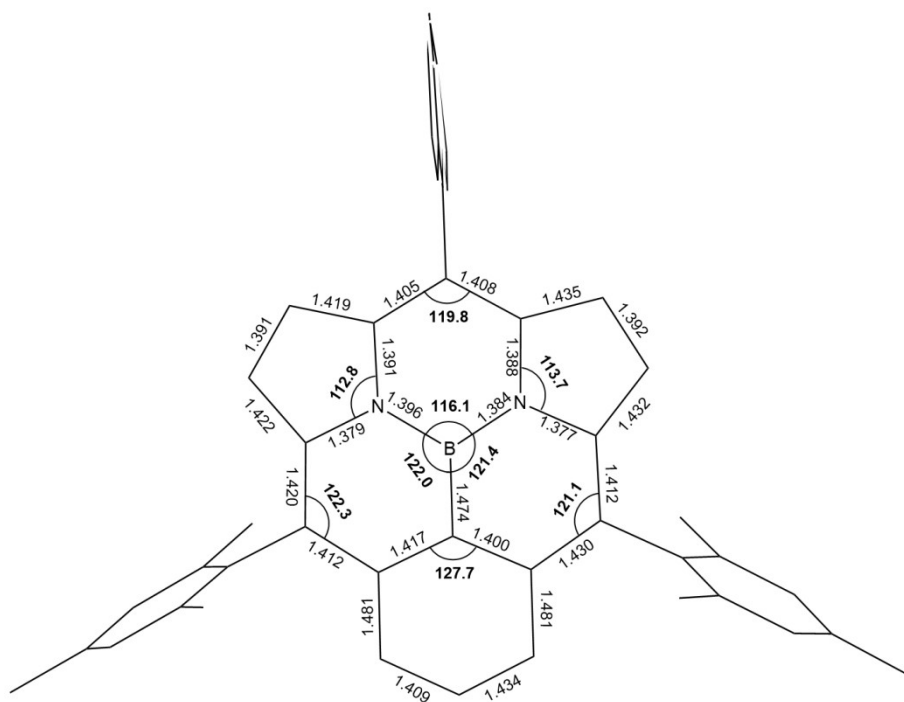

**Figure S27.** Structural analysis of **9**

**Table S5.** Crystal data and structure refinement for **10**.

|                                   |                                                    |                  |
|-----------------------------------|----------------------------------------------------|------------------|
| Identification code               | exp_3736_sq                                        |                  |
| Empirical formula                 | C <sub>49</sub> H <sub>39</sub> B N <sub>2</sub> O |                  |
| Formula weight                    | 682.63                                             |                  |
| Temperature                       | 99.98(10) K                                        |                  |
| Wavelength                        | 1.54184 Å                                          |                  |
| Crystal system                    | Triclinic                                          |                  |
| Space group                       | P-1                                                |                  |
| Unit cell dimensions              | a = 11.9190(12) Å                                  | α = 104.186(8)°. |
|                                   | b = 12.5825(11) Å                                  | β = 110.328(9)°. |
|                                   | c = 14.8081(16) Å                                  | γ = 96.071(8)°.  |
| Volume                            | 1974.0(4) Å <sup>3</sup>                           |                  |
| Z                                 | 2                                                  |                  |
| Density (calculated)              | 1.148 Mg/m <sup>3</sup>                            |                  |
| Absorption coefficient            | 0.519 mm <sup>-1</sup>                             |                  |
| F(000)                            | 720                                                |                  |
| Crystal size                      | 0.1 x 0.05 x 0.05 mm <sup>3</sup>                  |                  |
| Theta range for data collection   | 3.339 to 66.599°.                                  |                  |
| Index ranges                      | -14 ≤ h ≤ 12, -14 ≤ k ≤ 14, -17 ≤ l ≤ 17           |                  |
| Reflections collected             | 12275                                              |                  |
| Independent reflections           | 6960 [R(int) = 0.0816]                             |                  |
| Completeness to theta = 66.599°   | 99.8 %                                             |                  |
| Absorption correction             | Semi-empirical from equivalents                    |                  |
| Max. and min. transmission        | 1.00000 and 0.59263                                |                  |
| Refinement method                 | Full-matrix least-squares on F <sup>2</sup>        |                  |
| Data / restraints / parameters    | 6960 / 6 / 485                                     |                  |
| Goodness-of-fit on F <sup>2</sup> | 1.027                                              |                  |
| Final R indices [I > 2σ(I)]       | R1 = 0.0818, wR2 = 0.1879                          |                  |
| R indices (all data)              | R1 = 0.1507, wR2 = 0.2274                          |                  |
| Extinction coefficient            | n/a                                                |                  |
| Largest diff. peak and hole       | 0.334 and -0.663 e.Å <sup>-3</sup>                 |                  |
| CCDC number                       | 2379627                                            |                  |

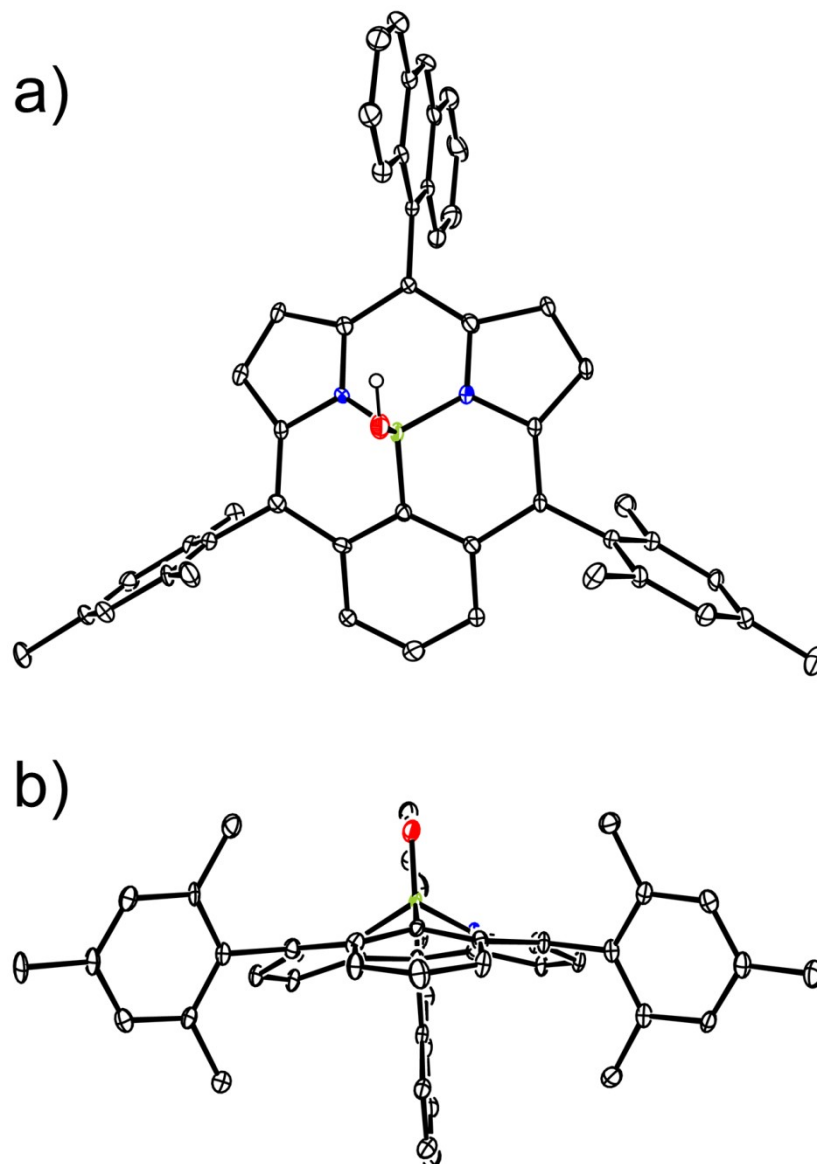

**Figure S28.** X-ray crystal structure of **10**. (a) Top view and (b) side view. The thermal ellipsoids are 30% probability level.



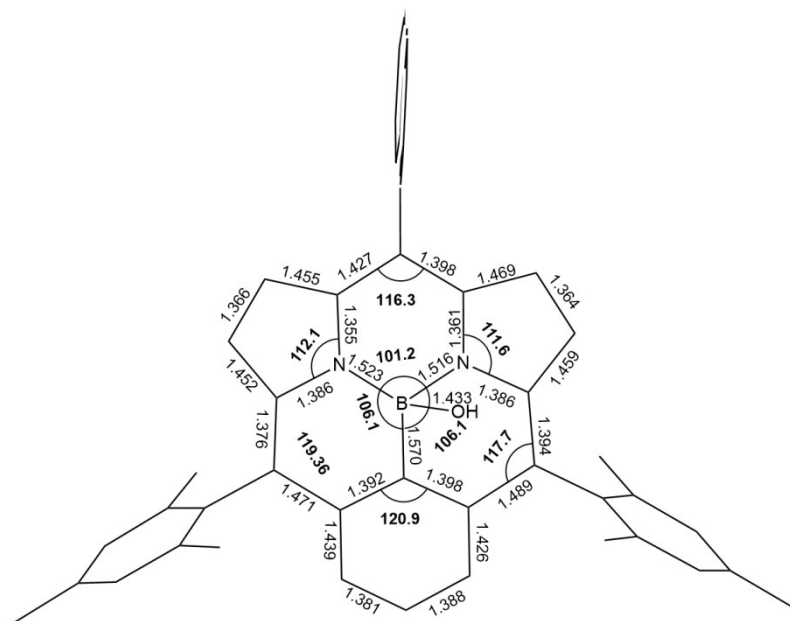

**Figure S29.** Structural analysis of **10**.

**Table S6.** Crystal data and structure refinement for **11**.

|                                   |                                                                 |                 |
|-----------------------------------|-----------------------------------------------------------------|-----------------|
| Identification code               | exp_3517_sq                                                     |                 |
| Empirical formula                 | C <sub>49</sub> H <sub>39</sub> B N <sub>2</sub> O <sub>2</sub> |                 |
| Formula weight                    | 698.63                                                          |                 |
| Temperature                       | 100.00(10) K                                                    |                 |
| Wavelength                        | 1.54184 Å                                                       |                 |
| Crystal system                    | Monoclinic                                                      |                 |
| Space group                       | P 1 21/c 1                                                      |                 |
| Unit cell dimensions              | a = 13.211(2) Å                                                 | α = 90°.        |
|                                   | b = 20.856(2) Å                                                 | β = 114.86(2)°. |
|                                   | c = 15.732(3) Å                                                 | γ = 90°.        |
| Volume                            | 3932.9(11) Å <sup>3</sup>                                       |                 |
| Z                                 | 4                                                               |                 |
| Density (calculated)              | 1.180 Mg/m <sup>3</sup>                                         |                 |
| Absorption coefficient            | 0.552 mm <sup>-1</sup>                                          |                 |
| F(000)                            | 1472                                                            |                 |
| Crystal size                      | 0.1 x 0.05 x 0.05 mm <sup>3</sup>                               |                 |
| Theta range for data collection   | 3.688 to 66.597°.                                               |                 |
| Index ranges                      | -15 ≤ h ≤ 15, -24 ≤ k ≤ 24, -18 ≤ l ≤ 18                        |                 |
| Reflections collected             | 27391                                                           |                 |
| Independent reflections           | 6939 [R(int) = 0.1325]                                          |                 |
| Completeness to theta = 66.597°   | 100.0 %                                                         |                 |
| Absorption correction             | Semi-empirical from equivalents                                 |                 |
| Max. and min. transmission        | 1.00000 and 0.33807                                             |                 |
| Refinement method                 | Full-matrix least-squares on F <sup>2</sup>                     |                 |
| Data / restraints / parameters    | 6939 / 0 / 498                                                  |                 |
| Goodness-of-fit on F <sup>2</sup> | 0.778                                                           |                 |
| Final R indices [I > 2σ(I)]       | R1 = 0.0543, wR2 = 0.1082                                       |                 |
| R indices (all data)              | R1 = 0.1272, wR2 = 0.1332                                       |                 |
| Extinction coefficient            | n/a                                                             |                 |
| Largest diff. peak and hole       | 0.253 and -0.313 e.Å <sup>-3</sup>                              |                 |
| CCDC number                       | 2379628                                                         |                 |

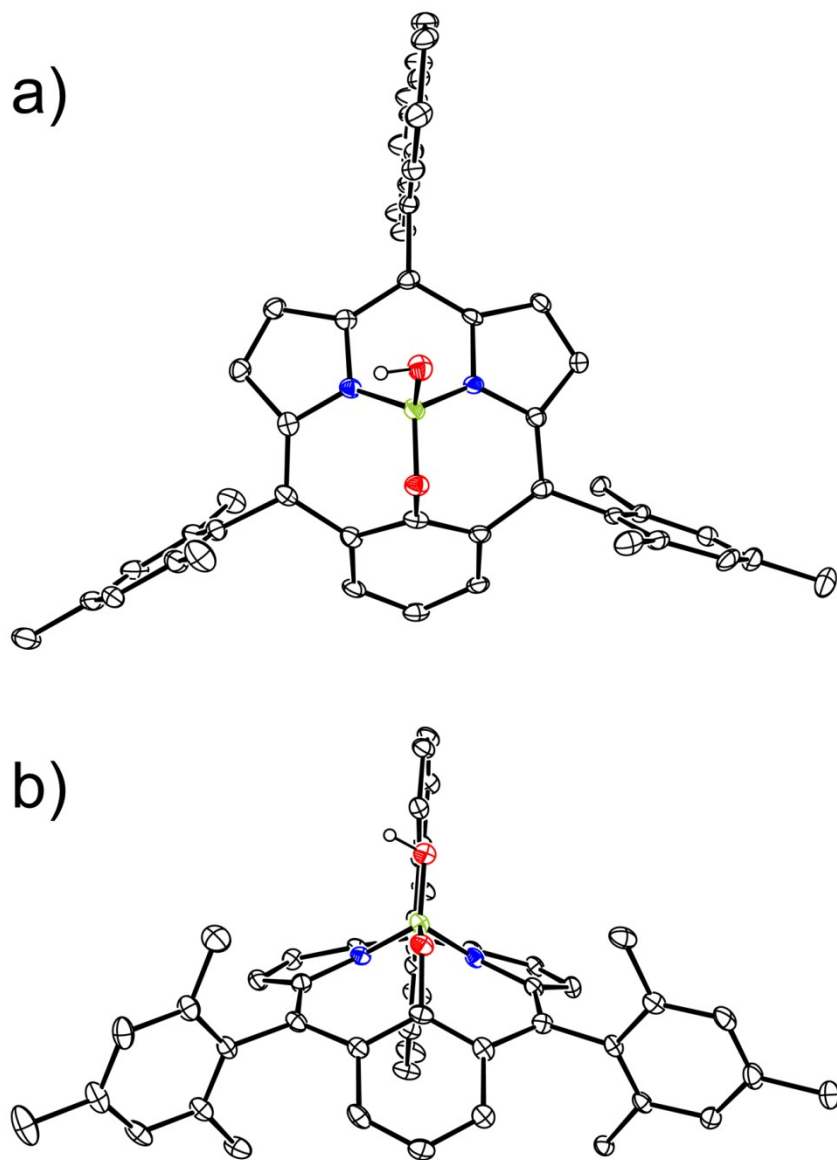

**Figure S30.** X-ray crystal structure of **11**. (a) Top view and (b) side view. The thermal ellipsoids are 30% probability level.

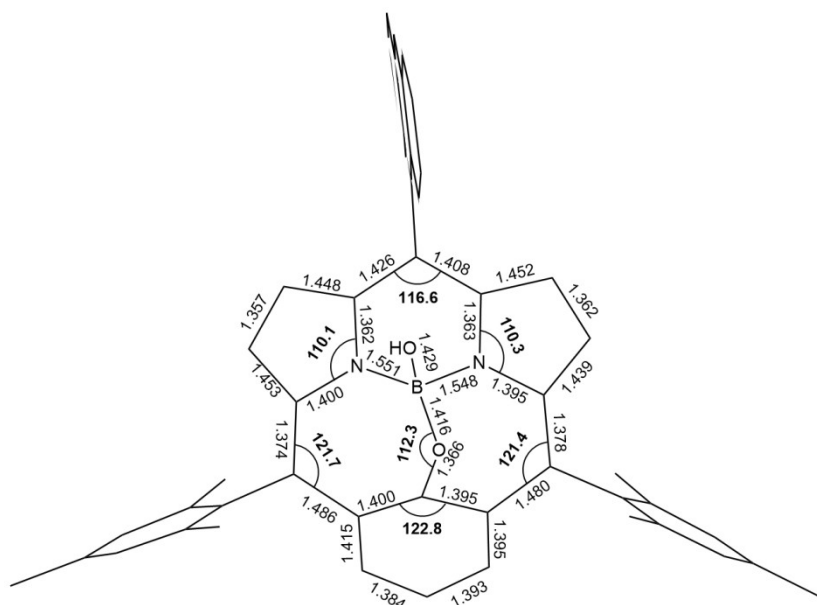

**Figure S31.** Structural analysis of **11**.

**Table S7.** Crystal data and structure refinement for **12**.

|                                   |                                             |                              |
|-----------------------------------|---------------------------------------------|------------------------------|
| Identification code               | exp_3498_sq                                 |                              |
| Empirical formula                 | C50 H41 B N2 O2                             |                              |
| Formula weight                    | 712.66                                      |                              |
| Temperature                       | 100.00(10) K                                |                              |
| Wavelength                        | 1.54184 Å                                   |                              |
| Crystal system                    | Triclinic                                   |                              |
| Space group                       | P-1                                         |                              |
| Unit cell dimensions              | a = 14.4553(6) Å                            | $\alpha = 92.220(3)^\circ$ . |
|                                   | b = 15.1300(6) Å                            | $\beta = 94.235(3)^\circ$ .  |
|                                   | c = 21.0270(7) Å                            | $\gamma = 98.658(4)^\circ$ . |
| Volume                            | 4528.2(3) Å <sup>3</sup>                    |                              |
| Z                                 | 4                                           |                              |
| Density (calculated)              | 1.045 Mg/m <sup>3</sup>                     |                              |
| Absorption coefficient            | 0.487 mm <sup>-1</sup>                      |                              |
| F(000)                            | 1504                                        |                              |
| Crystal size                      | 0.2 x 0.2 x 0.05 mm <sup>3</sup>            |                              |
| Theta range for data collection   | 2.958 to 66.600°.                           |                              |
| Index ranges                      | -17 ≤ h ≤ 17, -17 ≤ k ≤ 18, -17 ≤ l ≤ 25    |                              |
| Reflections collected             | 29740                                       |                              |
| Independent reflections           | 15982 [R(int) = 0.0562]                     |                              |
| Completeness to theta = 66.600°   | 99.9 %                                      |                              |
| Absorption correction             | Semi-empirical from equivalents             |                              |
| Max. and min. transmission        | 1.00000 and 0.62092                         |                              |
| Refinement method                 | Full-matrix least-squares on F <sup>2</sup> |                              |
| Data / restraints / parameters    | 15982 / 78 / 1005                           |                              |
| Goodness-of-fit on F <sup>2</sup> | 1.029                                       |                              |
| Final R indices [I > 2σ(I)]       | R1 = 0.0622, wR2 = 0.1525                   |                              |
| R indices (all data)              | R1 = 0.0881, wR2 = 0.1684                   |                              |
| Extinction coefficient            | n/a                                         |                              |
| Largest diff. peak and hole       | 0.401 and -0.704 e.Å <sup>-3</sup>          |                              |
| CCDC number                       | 2379629                                     |                              |

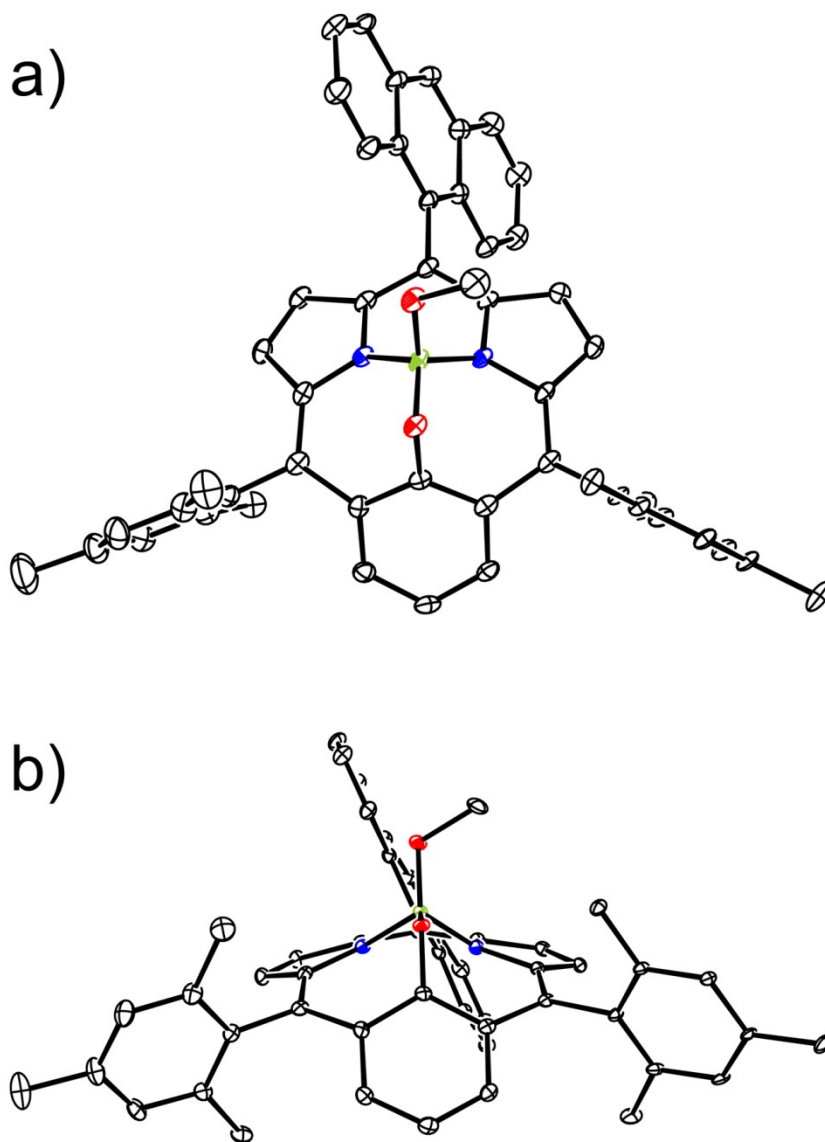

**Figure S32.** X-ray crystal structure of **12**. (a) Top view and (b) side view. The thermal ellipsoids are 30% probability level.

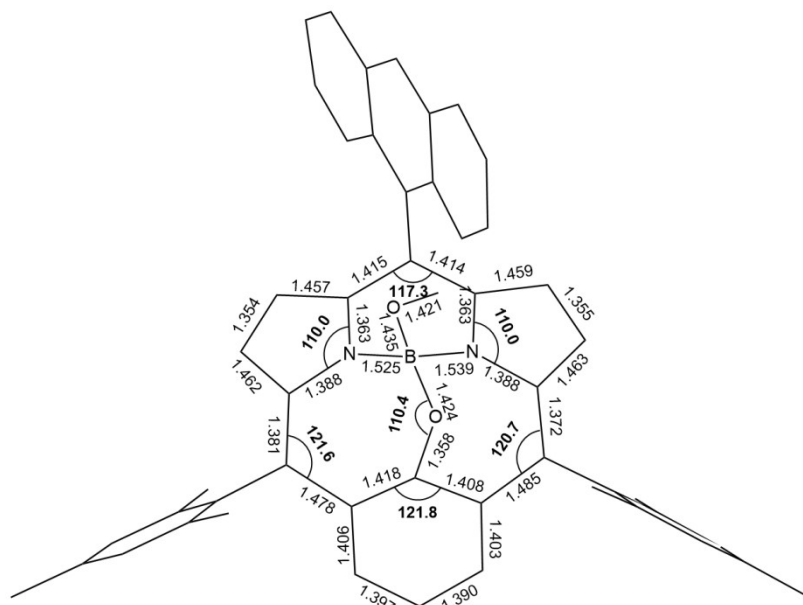

Figure S33. Structural analysis of 12.

## 6. DFT Calculation

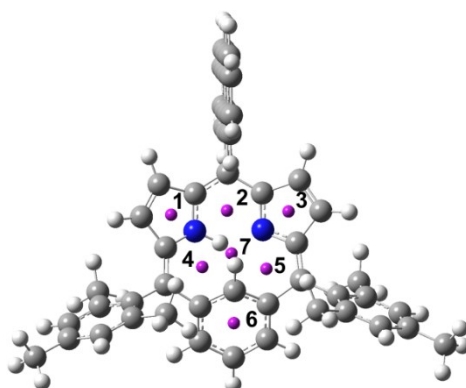

| position | 1       | 2      | 3       | 4      | 5       | 6       | 7      |
|----------|---------|--------|---------|--------|---------|---------|--------|
| 6        | -4.0287 | 2.0801 | -2.6389 | 0.0419 | -0.6589 | -8.0409 | 1.5118 |

Figure S34. NICS values at various positions of 6 on the optimized structure.

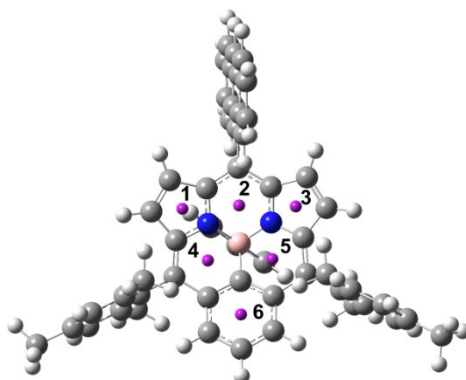

| position | 1       | 2      | 3       | 4      | 5      | 6       |
|----------|---------|--------|---------|--------|--------|---------|
| <b>8</b> | -1.8352 | 1.0489 | -2.2078 | 4.8300 | 5.5793 | -2.3629 |

**Figure S35.** NICS values at various positions of **8** on the optimized structure.

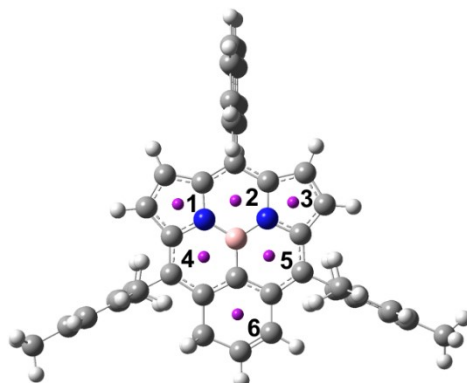

| position | 1        | 2       | 3        | 4        | 5        | 6      |
|----------|----------|---------|----------|----------|----------|--------|
| <b>9</b> | -13.5152 | -9.5777 | -14.5315 | -11.6418 | -10.4852 | 9.0935 |

**Figure S36.** NICS values at various positions of **9** on the optimized structure.

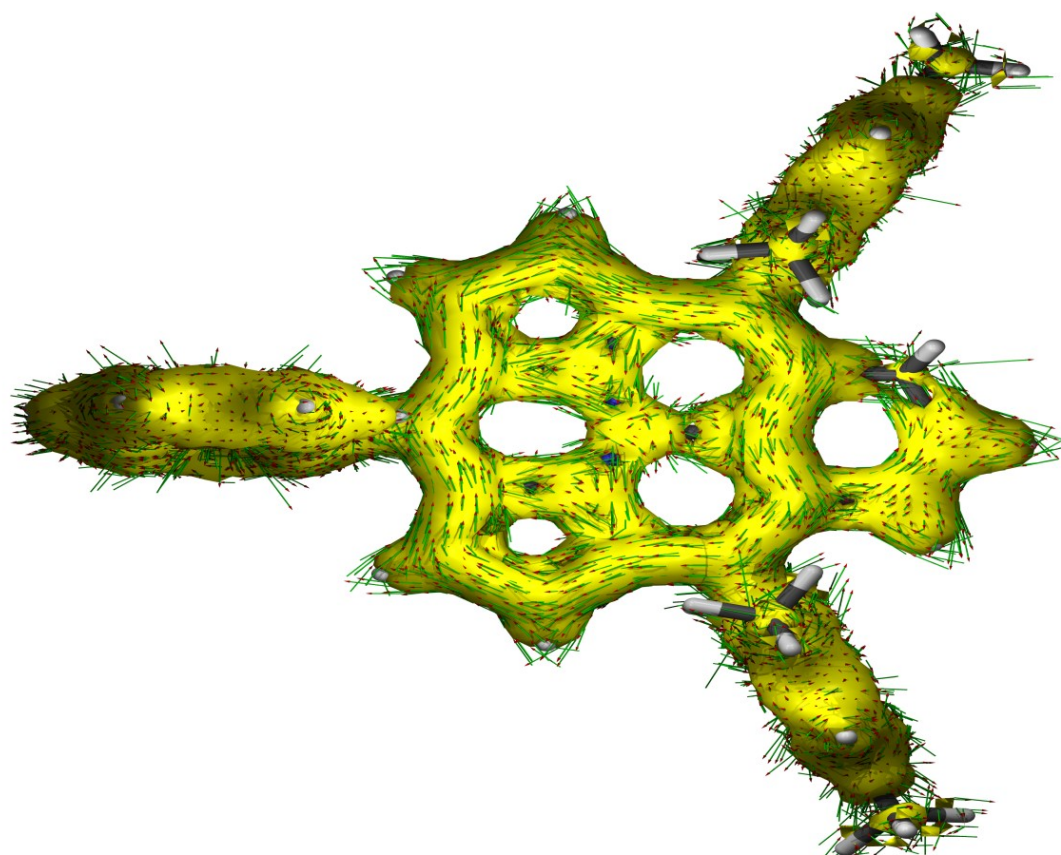

**Figure S37.** ACID plot of **9** at isosurface value of 0.04. The external magnetic field was applied in the direction from the back of the paper to the surface.



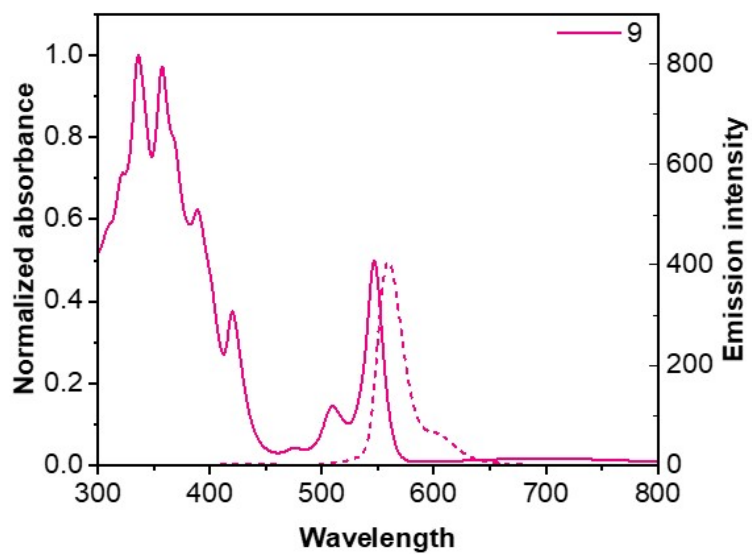

**Figure S38.** UV-Vis and fluorescence spectra of **9** with solid and dotted lines, respectively.

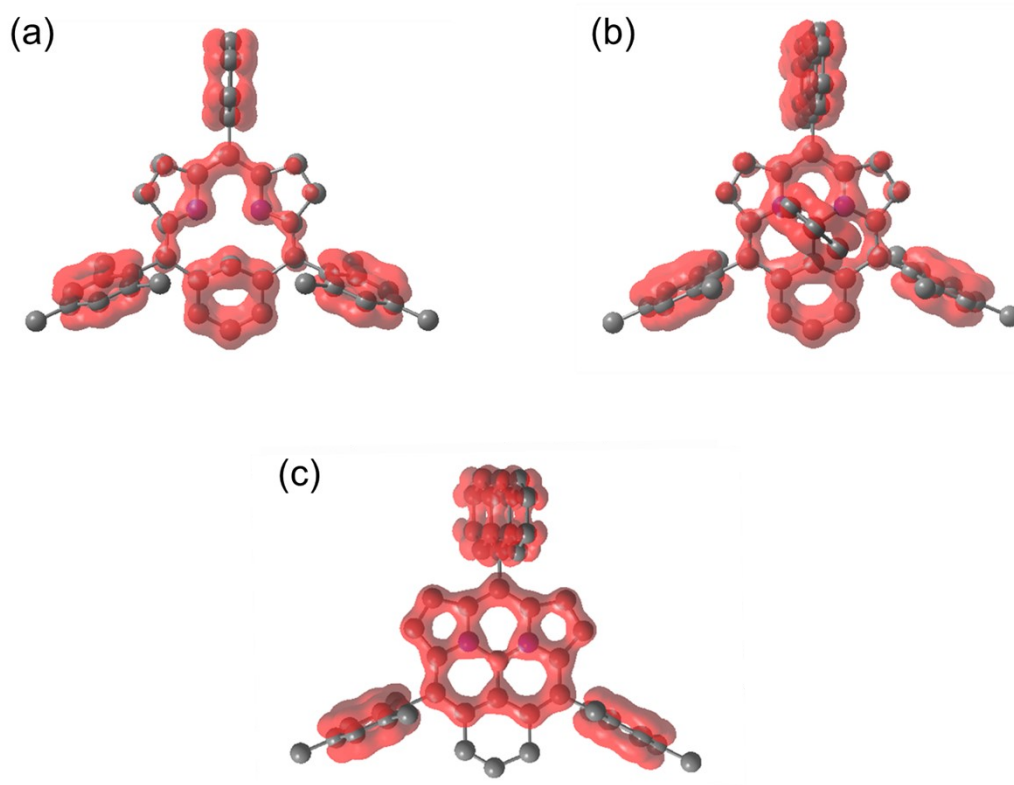

**Figure S39.** EDDB plots of (a) **6**, (b) **8**, and (c) **9**, where cyclic  $\pi$ -conjugation pathways are visualized with red-colored surface with an isovalue of 0.02.

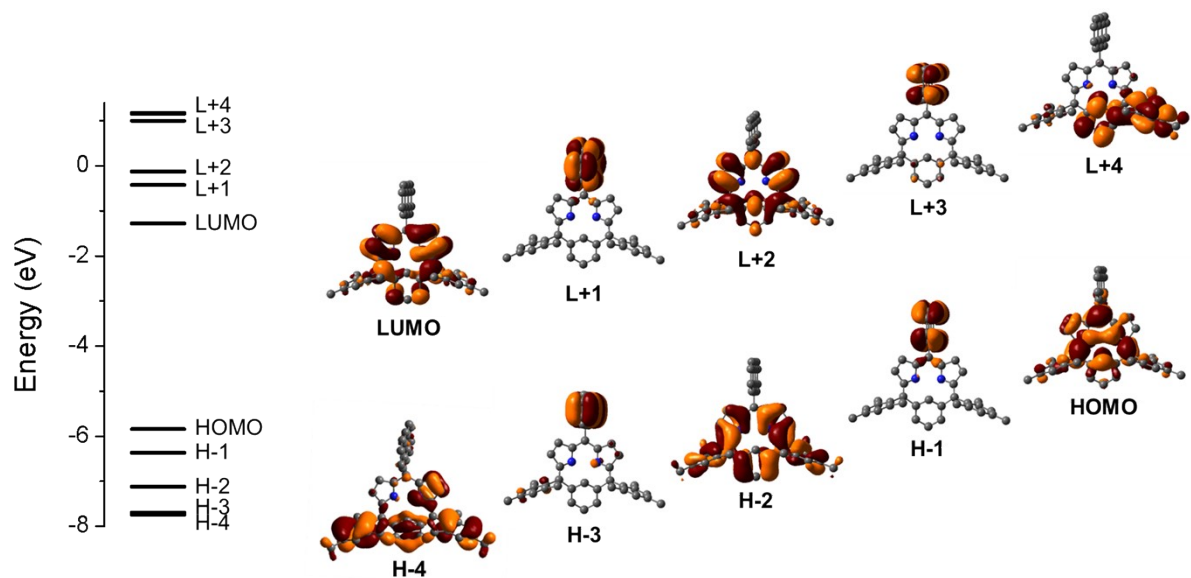

**Figure S40.** MO energy diagram and electron density distribution of **6**.

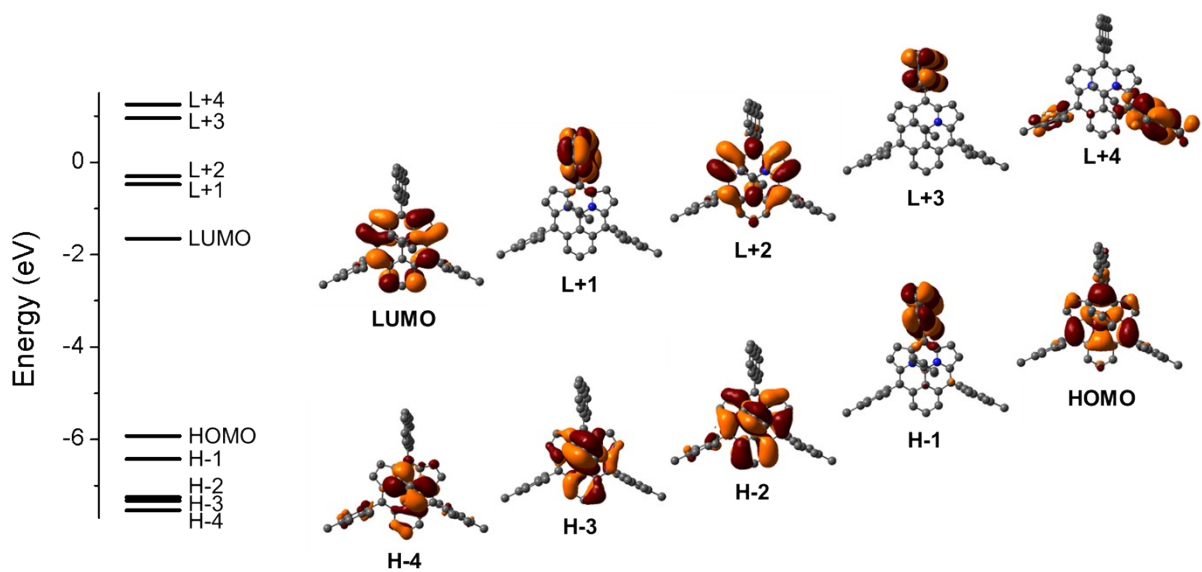

**Figure S41.** MO energy diagram and electron density distribution of **8**.

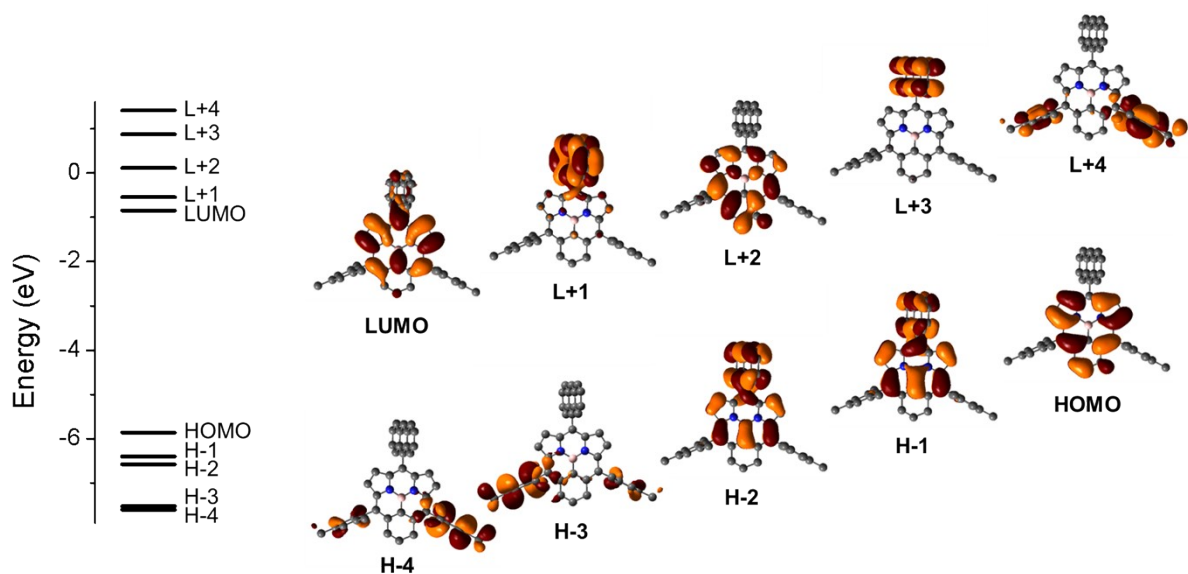

**Figure S42.** MO energy diagram and electron density distribution of **9**.

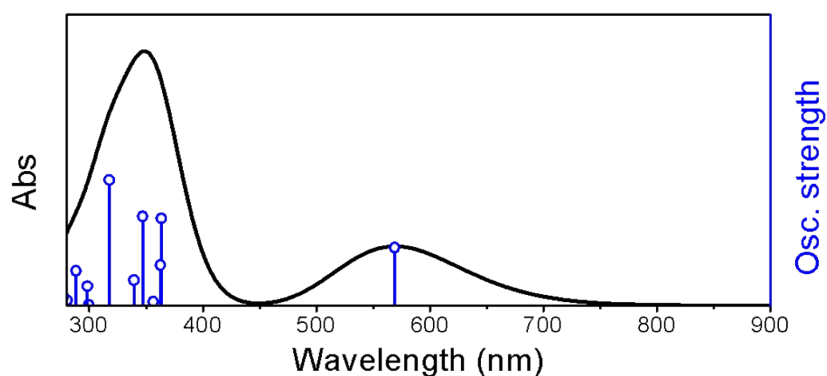

| No. | Wavelength (nm) | Osc. Strength | Major contributions                                           |
|-----|-----------------|---------------|---------------------------------------------------------------|
| 1   | 568.9           | 0.1501        | HOMO→LUMO (95%)                                               |
| 2   | 363.3           | 0.2253        | HOMO→L+1 (17%), HOMO→L+2 (58%), H-1→LUMO (8%), H-1→L+1 (9%)   |
| 3   | 362.5           | 0.1045        | H-1→LUMO (76%), HOMO→L+1 (8%)                                 |
| 4   | 356.2           | 0.0099        | HOMO→L+1 (65%), HOMO→L+2 (23%)                                |
| 5   | 346.3           | 0.2303        | H-2→LUMO (48%), H-1→L+1 (11%), H-8→LUMO (9%), H-7→LUMO (7%)   |
| 6   | 339.2           | 0.0658        | H-1→L+1 (68%), H-8→LUMO (9%)                                  |
| 7   | 317.4           | 0.3238        | H-8→LUMO (10%), H-4→LUMO (14%), H-2→LUMO (38%), H-7→LUMO (9%) |

**Figure S43.** Simulated absorption spectrum and MO contributions on electronic transitions of **6** (Contributions less than 6% are omitted for clarity).

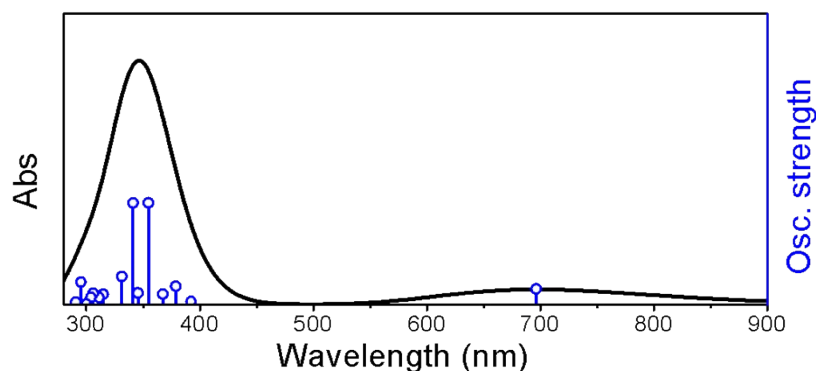

| No. | Wavelength (nm) | Osc. Strength | Major contributions                                            |
|-----|-----------------|---------------|----------------------------------------------------------------|
| 1   | 696.2           | 0.0544        | HOMO→LUMO (96%)                                                |
| 2   | 392.2           | 0.0107        | H-1→LUMO (92%)                                                 |
| 3   | 378.8           | 0.0635        | H-2→LUMO (18%), HOMO→L+2 (66%)                                 |
| 4   | 367.2           | 0.0364        | H-9→LUMO (22%), H-6→LUMO (18%), H-5→LUMO (17%), H-4→LUMO (22%) |
| 5   | 354.7           | 0.3499        | H-2→LUMO (17%), H-1→L+1 (25%), HOMO→L+1 (53%)                  |
| 6   | 345.4           | 0.0401        | H-3→LUMO (52%), H-2→LUMO (32%)                                 |
| 7   | 341.1           | 0.3495        | H-3→LUMO (24%), H-1→L+1 (26%), HOMO→L+1 (29%)                  |

**Figure S44.** Simulated absorption spectrum and MO contributions on electronic transitions of **8** (Contributions less than 6% are omitted for clarity).

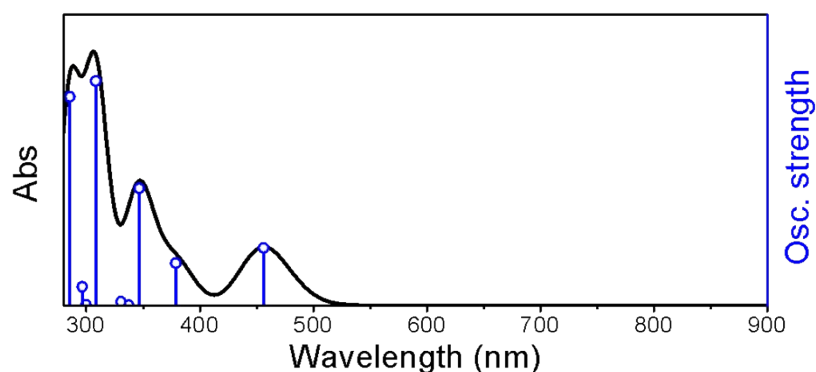

| No. | Wavelength (nm) | Osc. Strength | Major contributions                                          |
|-----|-----------------|---------------|--------------------------------------------------------------|
| 1   | 456.1           | 0.1508        | HOMO→LUMO (84%), H-1→L+2 (7%)                                |
| 2   | 378.7           | 0.111         | H-2→LUMO (10%), H-1→LUMO (61%), HOMO→L+2 (25%)               |
| 3   | 346.7           | 0.3067        | H-2→LUMO (21%), H-2→L+1 (27%), H-1→L+1 (32%), HOMO→L+2 (10%) |
| 4   | 337.4           | 0.0013        | HOMO→L+1 (91%)                                               |
| 5   | 330.3           | 0.0104        | H-2→LUMO (48%), H-2→L+1 (18%), H-1→LUMO (15%), H-1→L+1 (16%) |
| 6   | 308.2           | 0.587         | H-2→LUMO (18%), H-1→LUMO (13%), HOMO→L+2 (55%)               |
| 7   | 299.7           | 0.0024        | H-7→L+1 (44%), H-2→L+3 (25%), H-1→L+3 (18%)                  |

**Figure S45.** Simulated absorption spectrum and MO contributions on electronic transitions of **9** (Contributions less than 6% are omitted for clarity).

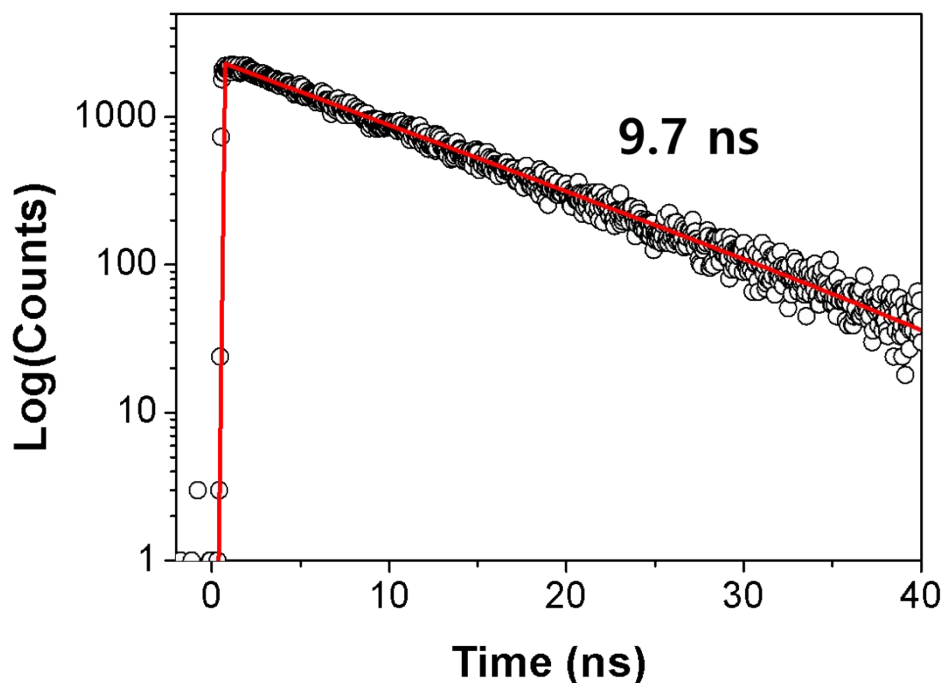

**Figure S46.** Fluorescence decay profile of **9** in toluene at 560 nm (Photoexcitation at 420 nm).

**Transient absorption measurement** The femtosecond transient absorption (fs-TA) spectrometer consisted of an optical detection system and an optical parametric amplifier (OPA; Palitra, Quantronix) pumped by a Ti:sapphire regenerative amplifier system (Integra-C, Quantronix) operating at a 1 kHz repetition rate. White light continuum (WLC) probe pulses were generated using a sapphire window (4 mm thick). The intensities of the spectrally dispersed WLC probe pulses were monitored using a high-speed spectrometer (Ultrafast Systems). The cross-correlation full-width at half maximum in the pump-probe experiments was <200 fs. The nanosecond transient absorption (ns-TA) data were measured with the commercial spectrometer (EOS; Ultrafast Systems). After the TA experiments, the absorption spectra of all compounds were carefully examined to determine the presence of artifacts caused by any degradation or photo-oxidation of the samples (Z-202308028841 at the Research Support Center for Bio-Bigdata Analysis and Utilization of Biological Resources).

**Computational methods** Quantum mechanical calculations were performed by the Gaussian 16, Revision A.03 program suite. All (TD)DFT calculations were performed with camB3LYP/6-31(d,p) with dispersion correction method, DFT-D3(BJ).
